# Supplementary material for: Combining machine learning and high-throughput experimentation to discover photocatalytically active organic molecules
Source: Chem Sci. 2021 Jun 21;12(32):10742–54. doi: 10.1039/d1sc02150h (PMC8372320; doi:10.1039/d1sc02150h)
Supplement: SC-012-D1SC02150H-s001 [file SC-012-D1SC02150H-s001.csv]

ID	Triplet state quantum yield	Solvent	Reference
2	0.03	ethanol	Photochemistry and Photobiology, 37: 271-278.
196	0.03	CH3CN	J. Phys. Chem. A 2000, 104, 24, 5747–5757
464	0.04	ethanol	Photochemistry and Photobiology, 37: 271-278
146	0.32	ethanol	Photochemistry and Photobiology, 37: 271-278
487	0.43	PBS	J. Am. Chem. Soc. 1997, 119, 49, 11785–11795
95	0.46	CH3CN	J. Phys. Chem. A 2000, 104, 24, 5747–5757
255	0.46	MEOH	Photochemistry and Photobiology, 38: 141-152
527	0.62	CH3CN	J. Phys. Chem. A 2000, 104, 24, 5747–5757
70	0.68	CH3CN	J. Phys. Chem. A 2000, 104, 24, 5747–5757
153	0.69	ethanol	Photochemistry and Photobiology, 37: 271-278
137	0.7	Benzene	J. Chem. Soc., Perkin Trans. 2, 1976, 869-874
209	0.89	CH3CN	J. Phys. Chem. A 2000, 104, 24, 5747–5757
333	0.97	CH3CN	Journal of Photochemistry and Photobiology A: Chemistry, 1989, 46, 253-267
338	0.99	CH3CN	Journal of Photochemistry and Photobiology A: Chemistry, 1989, 46, 253-267
67	1	CH3CN	Journal of Photochemistry and Photobiology A: Chemistry, 1989, 46, 253-267
520	1	CH3CN	Journal of Photochemistry and Photobiology A: Chemistry, 1989, 46, 253-267
