# Supplementary material for: Combining machine learning and high-throughput experimentation to discover photocatalytically active organic molecules
Source: Chem Sci. 2021 Jun 21;12(32):10742–54. doi: 10.1039/d1sc02150h (PMC8372320; doi:10.1039/d1sc02150h)
Supplement: SC-012-D1SC02150H-s002 [file SC-012-D1SC02150H-s002.csv]

ID	Experimental λ1st max (nm)	Reference
369	238	PhotochemCAD
528	247.5	PhotochemCAD
398	251	PhotochemCAD
67	252	PhotochemCAD
250	270	PhotochemCAD
422	273	PhotochemCAD
524	275	PhotochemCAD
288	281	PhotochemCAD
46	290	NIST
25	293.75	PhotochemCAD
343	297	NIST
84	300	NIST
43	310	PhotochemCAD
331	310	NIST
539	310	NIST,Broad
260	312	PhotochemCAD
458	315	NIST
529	315	NIST
450	316	PhotochemCAD
26	319	PhotochemCAD
210	322	NIST
493	324	PhotochemCAD
456	325	NIST
512	326	PhotochemCAD
95	335	PhotochemCAD
520	337	NIST
439	340	NIST
112	341	NIST
70	376.5	PhotochemCAD
338	382	NIST
255	395	NIST
257	395	NIST
431	400	NIST
149	401	PhotochemCAD
525	419.25	PhotochemCAD
214	428	TCI
57	430	NIST
196	435.75	PhotochemCAD
142	440	NIST
566	450	Nat. Mater. 18, 1084–1090 (2019)
2	500.25	PhotochemCAD
464	502	PhotochemCAD
146	524	Aldrich
351	528	PhotochemCAD
153	533	Aldrich
232	615	PubChem
