# Supplementary material for: Combining machine learning and high-throughput experimentation to discover photocatalytically active organic molecules
Source: Chem Sci. 2021 Jun 21;12(32):10742–54. doi: 10.1039/d1sc02150h (PMC8372320; doi:10.1039/d1sc02150h)
Supplement: SC-012-D1SC02150H-s003 [file SC-012-D1SC02150H-s003.csv]

ID	CAS	B3LYP S1-T1 (eV)	exp S1-T1 (eV)	Reference
5	02/03/3988	0.577942433	0.28516	J. Am. Chem. Soc., 1966, 88, 22, 5087–5097
50	1122-91-4	0.501727392	0.23557	J. Am. Chem. Soc., 1966, 88, 22, 5087–5097
67	119-61-9	0.565987802	0.22	Book: Moodern Molecular Photochemistry of Organic Molecules, page 306
70	120-12-7	1.359615434	1.46133676	J. Phys. Chem. A, 2000, 104, 24, 5747–5757
95	129-00-0	1.417832487	1.24369086	J. Phys. Chem. A, 2000, 104, 24, 5747–5757
146	15086-94-9	0.840850939	0.434	Trans. Faraday Soc., 1961,57, 1894-1904
153	15905-32-5	0.095222407	0.35964	Food Hydrocoll., 2004, 18, 4, 621-630
190	191-07-1	0.58208383	0.529	Photochem. Photobiol., 2008, 70, 10-34
196	198-55-0	1.12356674	1.264419041	J. Phys. Chem. A, 2000, 104, 24, 5747–5757
209	217-59-4	0.770067409	0.684029973	J. Phys. Chem. A, 2000, 104, 24, 5747–5757
210	218-01-9	1.118533113	0.954	Photochem. Photobiol., 2008, 70, 10-34
333	486-25-9	0.566426448	0.52	Book: Moodern Molecular Photochemistry of Organic Molecules, page 306
338	492-22-8	0.725660282	0.2962	Chem. Phys., 2000, 255, 2–3, 335-346
344	50-32-8	1.198380291	1.244	Photochem. Photobiol., 2008, 70, 10-34
356	523-27-3	1.27786605	1.3	Book: Moodern Molecular Photochemistry of Organic Molecules, page 306
502	86-73-7	1.376497951	1.192	Photochem. Photobiol., 2008, 70, 10-34
520	90-47-1	0.468925503	0.40915	Chem. Phys. Lett., 1996, 259, 5–6, 495-502
524	91-20-3	1.753406728	1.3	Book: Moodern Molecular Photochemistry of Organic Molecules, page 306
527	92-24-0	1.221877657	1.347331765	J. Phys. Chem. A, 2000, 104, 24, 5747–5757
528	92-52-4	1.399609351	1.492	Photochem. Photobiol., 2008, 70, 10-34
566	1416881-52-1	0.009795252	0.083	Nature, 2012, 492, 234
