# Supplementary material for: Combining machine learning and high-throughput experimentation to discover photocatalytically active organic molecules
Source: Chem Sci. 2021 Jun 21;12(32):10742–54. doi: 10.1039/d1sc02150h (PMC8372320; doi:10.1039/d1sc02150h)
Supplement: SC-012-D1SC02150H-s005 [file SC-012-D1SC02150H-s005.csv]

ID	CAS	SMILES	HER (µmol/h)	EA* (V)	EA (V)	Sr (a.u.)	Δσ (Ang)	H_CT (Ang)	ΔD (a.u.)	E_eb (eV)	E_sol (eV)	E_b (eV)	S1-S0 (eV)	S1-T1 (eV)
1	2144-08-3	O=Cc1ccc(O)c(O)c1O	0	0.958740415	-2.932459585	0.481	0.711	1.412	2.3943	1.221483537	-0.399406019	-0.494217733	3.8912	0.597741266
2	2321-07-5	O=C1OC2(c3ccc(O)cc3Oc3cc(O)ccc32)c2ccccc21	20.22317364	1.067595008	-2.985404992	0.24622	-0.644	1.262	6.8428	0.538294621	-0.526185452	-0.603324622	4.053	0.026847485
3	3271-05-4	COc1ccc2c3c(cccc13)C(=O)N(C)C2=O	1.909048448	1.263281524	-2.088518476	0.7672	0.141	1.879	2.3756	0.318363544	-0.294899471	-0.760546303	3.3518	1.054449249
4	1078153-58-8	O=C(O)c1ccc(-c2cc(-c3ccc(C(=O)O)cc3)c(-c3ccc(C(=O)O)cc3)cc2-c2ccc(C(=O)O)cc2)cc1	0.051975372	1.408589832	-2.255410168	0.81078	1.067	0.862	0.0478	0.269294366	-0.684937809	-0.436595467	3.664	0.719231938
5	3988-03-2	O=C(c1ccc(Br)cc1)c1ccc(Br)cc1	6.774424863	1.395334177	-2.247065823	0.52997	0.854	1.222	1.8539	1.003206743	-0.195947755	-0.499122852	3.6424	0.577942433
6	4113-04-6	O=Cc1ccc2ncccc2c1	3.113823034	1.493109435	-2.167390565	0.47315	1.009	1.588	3.1014	0.667316066	-0.225135303	-0.462060957	3.6605	0.837977262
7	4181-05-9	O=Cc1ccc(N(c2ccccc2)c2ccccc2)cc1	0.317312308	0.477448035	-2.729351965	0.62365	0.022	2.439	5.7652	0.300403313	-0.246749048	-0.497382961	3.2068	0.322636711
8	4381-02-6	N#Cc1ccc(CCc2ccc(C#N)cc2)cc1	0	2.045900064	-2.864599936	0.80812	0.528	3.084	0.0002	0.31177166	-0.425935567	-0.400864389	4.9105	1.319917685
9	7657-09-2	FC(F)(F)c1cc(Br)ccc1Br	0	1.704279575	-3.131720425	0.76911	-0.636	1.431	0.3716	0.676981624	-0.098566948	-0.36782712	4.836	1.278345785
10	100125-12-0	Brc1cnc2c(ccc3cc(Br)cnc32)c1	0.654679887	1.464259728	-2.480440272	0.93393	-0.224	1.37	0.3441	0.656461166	-0.264042401	-0.64728919	3.9447	1.077729931
11	100-19-6	CC(=O)c1ccc([N+](=O)[O-])cc1	0	1.764480063	-1.574919937	0.41711	1.415	1.788	5.5378	1.200436529	-0.264011733	-0.399930226	3.3394	0.35021452
12	10040-98-9	O=Cc1ccc(-n2ccnc2)cc1	1.504342077	1.331580057	-2.433919943	0.475	1.036	1.554	2.9444	0.627415917	-0.328067678	-0.49715011	3.7655	0.564415179
13	1005771-04-9	CC(C)(C)c1cc2ccc3c(Br)cc(Br)c4ccc(c1)c2c34	0.121059858	0.943732222	-2.366167778	0.89825	-0.128	2.399	0.268	0.098915062	-0.120418982	-0.857488787	3.3099	1.292839068
14	10070-92-5	O=Cc1cncnc1	0.036443442	1.452472889	-2.155027111	0.47698	0.413	1.538	2.2124	1.568495008	-0.221155868	-0.268872246	3.6075	0.49523698
15	100-83-4	O=Cc1cccc(O)c1	0	1.141303839	-2.677996161	0.47558	0.65	1.329	2.2692	0.829915179	-0.265660901	-0.313273023	3.8193	0.724794255
16	1009-61-6	CC(=O)c1ccc(C(C)=O)cc1	5.520159642	1.408777049	-2.148122951	0.50652	-0.69	2.916	0.0015	1.287277994	-0.255760696	-0.528639252	3.5569	0.497807468
17	101-01-9	c1ccc(N=C(Nc2ccccc2)Nc2ccccc2)cc1	0	0.568324166	-3.684475834	0.72951	0.563	2.188	2.1526	0.417395608	-0.27439279	-0.529053451	4.2528	0.229920709
18	101048-76-4	N#Cc1ccc(C=O)cc1F	0.10360293	1.688047636	-1.830852364	0.47328	1.065	1.59	3.3076	1.322847072	-0.274736931	-0.270748838	3.5189	0.483867854
19	10111-08-7	O=Cc1ncc[nH]1	0.468773093	1.197809293	-2.748490707	0.48847	0.533	1.203	2.0443	1.116806889	-0.266887777	-0.419243156	3.9463	0.764787872
20	1016-05-3	O=S1(=O)c2ccccc2-c2ccccc21	0.222487753	1.588788719	-2.533111281	0.80128	-0.038	1.154	0.796	0.508784338	-0.375309406	-0.562718627	4.1219	1.020502119
21	1023290-12-1	O=Cc1cc(O)cc(F)c1	0	1.267837133	-2.520262867	0.47796	0.663	1.324	2.3252	0.877740004	-0.237741182	-0.42292046	3.7881	0.606423385
22	102587-98-4	Brc1cc2ccc3cc(Br)cc4ccc(c1)c2c34	0	1.156027965	-2.359772035	0.91498	0.005	1.89	0	0.08371675	-0.145406031	-0.714595524	3.5158	1.423998622
23	102664-66-4	c1ccc(Nc2cc(Nc3ccccc3)cc(Nc3ccccc3)c2)cc1	0	0.026584572	-3.971415428	0.7724	0.486	2.693	0.6795	0.45842154	-0.369742518	-0.720814801	3.998	0.758915266
24	10312-55-7	Nc1cc(C(=O)O)ccc1C(=O)O	0.108694256	0.883321588	-2.426378412	0.66404	0.535	1.571	1.6259	0.505280178	-0.320842588	0.259973118	3.3097	1.011585765
25	103-30-0	C(=C/c1ccccc1)\c1ccccc1	0	0.836833403	-2.841066597	0.86379	0.035	0.934	0.0001	0.269422009	-0.150112443	-0.452971343	3.6779	1.383740374
26	103-33-3	c1ccc(N=Nc2ccccc2)cc1	0	0.618060711	-1.968939289	0.56336	1.017	0.755	0.0007	1.370366815	-0.137285662	-0.470984159	2.587	0.803290175
27	10338-57-5	O=Cc1ccc(N2CCCCC2)cc1	0.431314655	0.760328093	-2.980271907	0.63073	-0.015	2.167	5.156	0.232012708	-0.235949835	-0.384204088	3.7406	0.422889834
28	103438-85-3	O=Cc1ccc(F)c(O)c1	0.000355923	1.201188215	-2.651611785	0.46787	0.701	1.285	2.3713	0.919311179	-0.270076887	-0.444842126	3.8528	0.65943576
29	1035631-57-2	CC1(C)OB(c2ccc3c4ccc(B5OC(C)(C)C(C)(C)O5)cc4n(-c4ccccc4)c3c2)OC1(C)C	0.01332698	0.587101167	-2.902798833	0.69649	0.551	1.563	1.2535	0.396314735	-0.335436416	-0.882355426	3.4899	0.597963147
30	1036248-62-0	c1cc(-c2cn[nH]c2)ccc1-c1cn[nH]c1	0	0.738903246	-3.557696754	0.8188	-0.452	0.764	0.0454	0.304115771	-0.455973387	-0.471559395	4.2966	1.194946824
31	10365-94-3	N#Cc1cc(C#N)cc(C#N)c1	0.001746852	2.576433227	-2.022466773	0.94625	-0.091	1.614	0.0018	0.948826318	-0.428374625	-0.213817898	4.5989	1.221037209
32	10386-27-3	N#Cc1ccnc(Br)c1	0.018717692	2.282071196	-2.201728804	0.66847	-0.069	1.693	3.343	0.680554531	-0.230833458	-0.230384839	4.4838	1.032854144
33	10386-84-2	Fc1c(F)c(-c2c(F)c(F)c(Br)c(F)c2F)c(F)c(F)c1Br	0	1.997993003	-2.600006997	0.81158	-0.706	3.028	0.0005	0.598839653	-0.114765835	-0.461573296	4.598	0.455703015
34	10387-13-0	ClCc1c2ccccc2c(CCl)c2ccccc12	0	0.936873327	-1.919726673	0.87722	-0.011	0.839	0.056	0.164460024	-0.249484627	-0.552567079	2.8566	1.210577675
35	10466-37-2	N#Cc1ccc(Cc2ccc(C#N)cc2)cc1	0	2.045019449	-2.797980551	0.82116	0.386	1.194	0.4546	0.346764225	-0.413318885	-0.407237073	4.843	1.178974308
36	104-88-1	O=Cc1ccc(Cl)cc1	0.964256927	1.316961717	-2.453538283	0.4774	0.783	1.374	2.5547	1.329202468	-0.168234869	-0.358683861	3.7705	0.502257277
37	105-07-7	N#Cc1ccc(C=O)cc1	0.136118255	1.60387671	-1.94402329	0.47051	1.083	1.574	3.3245	1.418633305	-0.278482676	-0.308296166	3.5479	0.477853258
38	1054484-40-0	Nc1c(Br)cnc(Cl)c1Br	0	1.366281587	-3.356318413	0.75525	-0.125	1.398	1.8045	0.685986016	-0.202197646	-0.431535607	4.7226	0.316517216
39	105598-27-4	N#Cc1nc2c3nc(C#N)c(C#N)nc3c3nc(C#N)c(C#N)nc3c2nc1C#N	0	3.042518006	-0.517781994	0.59304	0.369	2.375	0.3049	0.636955405	-0.961807617	-0.431080119	3.5603	0.471052365
40	105942-08-3	N#Cc1ccc(Br)cc1F	0	2.186868731	-2.621431269	0.79893	-0.137	1.943	1.4276	0.483424639	-0.202235742	-0.273242085	4.8083	1.542366416
41	10602-00-3	C#Cc1ccc(C(=O)O)cc1	0	1.901801754	-2.536598246	0.78285	0.229	2.364	3.2675	0.375046177	-0.218981522	-0.086811687	4.4384	1.553667732
42	106-37-6	Brc1ccc(Br)cc1	0	1.372683398	-3.692016602	0.83477	-0.594	1.648	0.0002	0.791445506	-0.089297146	-0.334289125	5.0647	1.396182959
43	106-50-3	Nc1ccc(N)cc1	0	-0.197046881	-4.445146881	0.71522	-0.505	0.751	0.194	0.629686017	-0.299937098	-0.22994358	4.2481	1.142740993
44	1074-24-4	Cc1cc(Br)c(C)cc1Br	0	1.329819868	-3.718280132	0.91069	-0.362	1.606	0.0042	0.64673311	-0.079427336	-0.387766179	5.0481	1.452113609
45	1081-34-1	c1csc(-c2ccc(-c3cccs3)s2)c1	0	0.483884667	-2.486615333	0.83458	-0.09	1.079	0.0945	0.223824711	-0.168301346	-0.540031414	2.9705	1.15285761
46	108-45-2	Nc1cccc(N)c1	0	0.050813323	-4.720386677	0.82711	-0.236	1.179	0.4394	0.728909455	-0.303004438	-0.259681564	4.7712	1.04305498
47	108-78-1	Nc1nc(N)nc(N)n1	0	0.920473568	-4.693626432	0.81601	-0.191	1.217	0.0234	1.222981442	-0.375033484	-0.050295913	5.6141	0.708388698
48	110677-45-7	O=Cc1ccc(-n2c3ccccc3c3ccccc32)cc1	3.930219272	0.697958714	-2.468441286	0.43829	-0.284	2.18	8.4749	0.374796295	-0.252783698	-0.693004402	3.1664	0.200911804
49	1109-15-5	Fc1c(F)c(F)c(B(c2c(F)c(F)c(F)c(F)c2F)c2c(F)c(F)c(F)c(F)c2F)c(F)c1F	0.045529621	1.969173091	-1.436326909	0.53686	-0.885	2.14	0.0235	0.487117282	-0.141767336	-0.596565643	3.4055	0.23682457
50	1122-91-4	O=Cc1ccc(Br)cc1	0.62420425	1.326919458	-2.435780542	0.47548	0.796	1.387	2.5707	1.20071323	-0.167845557	-0.320945805	3.7627	0.501727392
51	1129-35-7	COC(=O)c1ccc(C#N)cc1	0	2.322248238	-2.252851762	0.42546	1.164	1.562	4.4879	0.688850202	-0.265350883	-0.403636485	4.5751	0.933751324
52	1133116-47-8	N#Cc1ccc(-c2ccc(C#N)nc2)cn1	0.06014756	2.234069196	-1.864130804	0.79868	0.324	0.9	0.5623	0.409924833	-0.49412352	-0.32755506	4.0982	0.975143603
53	1141-38-4	O=C(O)c1ccc2cc(C(=O)O)ccc2c1	0	1.450956827	-2.169743173	0.77524	0.705	1.095	0.0001	0.408829741	-0.324244164	-0.294246035	3.6207	1.173983375
54	1143-38-0	O=C1c2c(O)cccc2Cc2cccc(O)c21	0	0.779442973	-2.704457027	0.50636	0.863	1.207	2.0935	0.939644603	-0.53487783	-1.086724155	3.4839	0.454132107
55	1150271-26-3	COC(=O)c1cc(Br)oc1Br	0	1.455750878	-3.122149122	0.61673	-0.355	1.57	3.5082	0.547786729	-0.166671389	-0.613377352	4.5779	1.445487386
56	116-71-2	O=c1c2ccccc2c2ccc3c4ccc5c6ccccc6c(=O)c6ccc(c7ccc1c2c73)c4c65	0.407277807	0.38888692	-1.44841308	0.83727	-0.028	1.818	1.5745	0.710412929	-0.393107229	-1.404589046	1.8373	0.770190268
57	117-12-4	O=C1c2cccc(O)c2C(=O)c2cccc(O)c21	0	1.273410157	-1.624889843	0.56404	0.029	1.773	0.0007	0.715486465	-0.543374395	-1.273283509	2.8983	0.392775932
58	117695-55-3	OB(O)c1cc(Br)cc(Br)c1	0	1.634012847	-3.180287153	0.81165	-0.316	1.411	1.3793	0.740902678	-0.297055694	-0.643391944	4.8143	1.094830873
59	118276-06-5	O=Cc1cc(F)c(O)c(F)c1	0.190808357	1.27860013	-2.58769987	0.46914	0.764	1.378	2.4818	0.995697177	-0.229434307	-0.298943029	3.8663	0.666566018
60	118727-34-7	Nc1ccc(-c2cc(-c3ccc(N)cc3)cc(-c3ccc(N)cc3)c2)cc1	0	0.355306123	-3.611593877	0.83811	-1.231	1.734	0.054	0.387835361	-0.568400519	-0.802620969	3.9669	0.908780956
61	118-75-2	O=C1C(Cl)=C(Cl)C(=O)C(Cl)=C1Cl	0	2.380362746	-0.296537254	0.59669	-0.353	1.633	0.0028	0.718757582	-0.213185025	-0.440270415	2.6769	0.720400936
62	118-79-6	Oc1c(Br)cc(Br)cc1Br	0.013904804	1.087333043	-3.256566957	0.5492	0.607	1.721	0.6515	0.868804929	-0.137044814	-0.411086013	4.3439	0.536855003
63	118-92-3	Nc1ccccc1C(=O)O	0.001382768	0.618603223	-3.192196777	0.67882	0.168	1.399	1.7632	0.624740459	-0.224241711	0.025395923	3.8108	0.938990452
64	119001-43-3	O=Cc1ccc(N(c2ccc(C=O)cc2)c2ccc(C=O)cc2)cc1	1.456985576	0.81863016	-2.28736984	0.60032	0.93	2.073	3.5561	0.288949544	-0.457904409	-0.533621271	3.106	0.507452377
65	1194-02-1	N#Cc1ccc(F)cc1	0	2.084868687	-3.080331313	0.95999	0.12	1.528	0.3393	0.610298859	-0.205123242	-0.220744416	5.1652	1.678316629
66	1194-98-5	O=Cc1cc(O)ccc1O	0	0.880879416	-2.654020584	0.64814	0.04	1.515	2.7123	0.595741435	-0.390615817	-0.510729522	3.5349	1.00246002
67	119-61-9	O=C(c1ccccc1)c1ccccc1	3.246451754	1.172046211	-2.508453789	0.52327	0.782	1.189	1.7609	1.17598727	-0.197898125	-0.360637173	3.6805	0.565987802
68	119-93-7	Cc1cc(-c2ccc(N)c(C)c2)ccc1N	0	0.15306412	-4.09013588	0.8155	-0.514	0.908	0.1112	0.275096036	-0.340687925	-0.415648818	4.2432	1.21420788
69	120077-69-2	O=Cc1ccc(Br)c(Cl)c1	1.454059262	1.469002303	-2.258397697	0.47375	0.776	1.448	2.6027	1.117896596	-0.16838679	-0.458031405	3.7274	0.504206341
70	120-12-7	c1ccc2cc3ccccc3cc2c1	0	0.60768643	-2.56181357	0.9005	0.052	0.982	0	0.210262128	-0.129823643	-0.508503251	3.1695	1.359615434
71	1204-60-0	O=Cc1cccc(-c2ccccc2)c1	3.144626224	1.217654667	-2.581945333	0.50282	0.355	1.262	2.1281	0.648611156	-0.204475831	-0.458483582	3.7996	0.506972451
72	120-61-6	COC(=O)c1ccc(C(=O)OC)cc1	0.083799714	2.182976133	-2.373723867	0.75323	0.784	1.529	0.0002	0.754464555	-0.231994918	-0.632140667	4.5567	0.907901297
73	1206487-35-5	Nc1nnc(Br)cc1Br	0.01476659	1.311818952	-2.611381048	0.55544	0.242	1.15	2.2374	0.740336268	-0.278379762	-0.459695527	3.9232	0.308199265
74	120-72-9	c1ccc2[nH]ccc2c1	0	0.641688431	-4.110711569	0.79769	0.073	1.615	1.9242	0.456568382	-0.198394486	-0.305667824	4.7524	1.454151926
75	1210-12-4	N#Cc1c2ccccc2cc2ccccc12	0.294476222	1.004442487	-1.939957513	0.86472	-0.164	1.604	0.01	0.184052712	-0.226126719	-0.584030858	2.9444	1.277787246
76	121-33-5	COc1cc(C=O)ccc1O	0.018261163	1.058071066	-2.869328934	0.46483	0.753	1.233	2.4592	0.534285675	-0.340446534	-0.522138562	3.9274	0.903773751
77	1217-45-4	N#Cc1c2ccccc2c(C#N)c2ccccc12	0.071440272	1.314968527	-1.330731473	0.82757	-0.206	1.08	0	0.199646265	-0.269600553	-0.610929203	2.6457	1.200322171
78	121848-75-7	Brc1c2ccccc2c(-c2c3ccccc3c(Br)c3ccccc23)c2ccccc12	1.436281684	0.662491861	-2.176008139	0.88666	-0.07	2.651	0.0259	0.291125219	-0.171688065	-0.702955544	2.8385	0.951009356
79	122-39-4	c1ccc(Nc2ccccc2)cc1	0	0.181810424	-4.074689576	0.70097	0.408	0.999	0.7338	0.471119669	-0.17517971	-0.391078061	4.2565	0.895908488
80	1226808-65-6	N#Cc1cncc(-c2cncc(C#N)c2)c1	0	2.137819433	-2.334080567	0.55435	0.1	1.328	2.1311	0.585477332	-0.440639819	-0.321352414	4.4719	0.803061654
81	122918-25-6	N#Cc1cccc(Br)n1	0	2.309102586	-2.355697414	0.68202	-0.268	1.734	2.9365	0.61689918	-0.269933919	-0.290560434	4.6648	1.029518855
82	123-08-0	O=Cc1ccc(O)cc1	0.007834821	1.055752174	-2.868047826	0.47613	0.746	1.372	2.4159	0.979054101	-0.280775663	-0.306486818	3.9238	0.624486872
83	123088-59-5	NC(=O)c1ccc(B(O)O)cc1	0	1.55923106	-2.97126894	0.49242	0.896	1.536	3.8916	1.152765069	-0.501675228	-0.611018761	4.5305	0.199981885
84	123-31-9	Oc1ccc(O)cc1	0	0.460782633	-4.232017367	0.7802	-0.275	0.772	0	0.701117629	-0.274569473	-0.240789185	4.6928	1.264697032
85	1242412-60-7	CC1(C)OB(c2ccc3c(c2)[nH]c2ccccc23)OC1(C)C	0	0.609844318	-3.191755682	0.75005	0.489	2.359	1.701	0.445492084	-0.287678952	-0.533490964	3.8016	0.781235226
86	1256358-83-4	OB(O)c1cc(F)c(B(O)O)cc1F	0	1.695278473	-2.920621527	0.78454	0.353	1.484	0.1986	0.745175549	-0.436373142	-0.617121711	4.6159	1.219357537
87	1257665-15-8	Brc1ccc(OCC2CCCCO2)c(Br)c1	0	1.378211834	-3.611788166	0.86133	-0.485	1.429	0.3837	0.74655157	-0.167967191	-0.533002713	4.99	0.239622164
88	1261973-55-0	N#Cc1ccc(-c2ccc(C#N)c(O)c2)cc1	8.341073444	1.690150022	-2.260749978	0.72831	0.776	2.888	3.7309	0.358199535	-0.526019654	-0.394196282	3.9509	1.09711118
89	126717-23-5	c1ccc(N(c2ccccc2)c2cc(N(c3ccccc3)c3ccccc3)cc(N(c3ccccc3)c3ccccc3)c2)cc1	0	0.031478569	-3.607321431	0.80022	-0.101	2.1	0.0188	0.44622784	-0.304828058	-0.98595972	3.6388	0.622545564
90	127406-55-7	O=Cc1ccc(-c2cccnc2)cc1	3.577008629	1.390809891	-2.333490109	0.47894	1.087	1.621	3.0631	0.740269447	-0.260651383	-0.511295083	3.7243	0.750057198
91	127406-56-8	O=Cc1ccc(-c2ccccn2)cc1	5.102781607	1.418710405	-2.262389595	0.47611	1.167	1.75	3.3303	0.640417194	-0.238493248	-0.480213846	3.6811	0.779407769
92	128055-74-3	Brc1ccc2c(c1)C1(c3cc(Br)ccc3-2)c2cc(Br)ccc2-c2ccc(Br)cc21	0.051098676	1.137467847	-2.893032153	0.77202	-0.353	2.02	2.2096	0.288012223	-0.233032131	-0.75524874	4.0305	1.022072755
93	128-63-2	Brc1cc(Br)c2ccc3c(Br)cc(Br)c4ccc1c2c43	0.38253665	1.108443413	-1.998656587	0.88745	-0.307	2.379	0.0013	0.101226558	-0.090534716	-0.919510953	3.1071	1.185038509
94	128-69-8	O=c1oc(=O)c2ccc3c4ccc5c(=O)oc(=O)c6ccc(c7ccc1c2c73)c4c65	0	1.45763495	-0.72676505	0.8698	0.251	1.538	0	0.091524288	-0.629590841	-1.08174301	2.1844	0.943707748
95	129-00-0	c1cc2ccc3cccc4ccc(c1)c2c34	0.197801792	0.823859076	-2.701240924	0.91517	0.03	1.866	0	0.094328728	-0.1350376	-0.595675725	3.5251	1.417832487
96	129365-93-1	N#Cc1cc(N)c(N)cc1C#N	0	1.142227086	-2.709472914	0.77821	0.1	1.87	4.1238	0.241048529	-0.57429114	-0.367573054	3.8517	1.340607062
97	129-39-5	O=C1c2cccc([N+](=O)[O-])c2C(=O)c2c1cccc2[N+](=O)[O-]	0	2.101988091	-0.944211909	0.59756	0.008	1.956	0.7118	1.043111443	-0.519933112	-0.831863805	3.0462	0.396440069
98	1295502-53-2	Fc1c(F)c(Br)c2nsnc2c1Br	2.626237292	1.759793721	-1.537606279	0.68971	-0.365	1.47	3.0364	0.458358049	-0.155429585	-0.498559584	3.2974	1.11549595
99	13001-40-6	N#Cc1ccc(/C=C/c2ccc(/C=C/c3ccc(C#N)cc3)cc2)cc1	0.411400025	0.805207331	-1.893592669	0.8276	0.885	1.336	0.0001	0.21358816	-0.499415247	-0.821345199	2.6988	0.842404432
100	130-15-4	O=C1C=CC(=O)c2ccccc21	0	1.540693042	-1.224006958	0.58596	-0.19	1.123	0.1274	1.360273212	-0.213726122	-0.440905925	2.7647	0.43943776
101	13029-09-9	Brc1ccccc1-c1ccccc1Br	0	1.482892504	-3.505607496	0.79625	-0.033	1.008	0.9337	0.634020713	-0.14577175	-0.385660302	4.9885	1.162612044
102	130345-50-5	O=Cc1ccc2nccnc2c1	0	1.554004682	-1.885295318	0.5478	0.381	1.872	1.5851	1.166178484	-0.225647474	-0.43021321	3.4393	0.366177512
103	131-14-6	Nc1ccc2c(c1)C(=O)c1ccc(N)cc1C2=O	0.006000998	0.896964738	-1.819335262	0.6699	-1.023	2.635	0.0025	0.37045466	-0.498573085	-0.689485069	2.7163	0.642018786
104	131276-24-9	Brc1cccc2cc3cccc(Br)c3cc12	0	0.871067646	-2.184732354	0.89292	-0.074	1.498	0.3206	0.198293515	-0.141344472	-0.661526227	3.0558	1.275801528
105	13130-50-2	O=Cc1ccc(-c2ccc(-c3ccc(C=O)s3)s2)s1	1.600223055	0.964990937	-1.604109063	0.81069	0.709	0.905	0.159	0.154294524	-0.345557115	-0.694965407	2.5691	0.965453931
106	131747-68-7	N#Cc1ccc(C=O)cn1	0	1.716077829	-1.674822171	0.47468	0.659	1.894	3.0472	1.438884631	-0.312428038	-0.265307635	3.3909	0.454827274
107	1320-06-5	Cc1ccc(C)c(N=Nc2cc(C)c(N=Nc3c(O)ccc4ccccc34)cc2C)c1	0	0.562966458	-1.532133542	0.68692	1.013	3.282	2.5671	0.403531091	-0.350203445	-1.216269391	2.0951	0.608113779
108	133059-44-6	N#Cc1ccc(Br)c(F)c1	0	2.159063261	-2.623236739	0.79096	-0.103	1.95	2.069	0.481369517	-0.199808494	-0.275289865	4.7823	1.569044375
109	1347736-74-6	Fc1cc(Br)c2nsnc2c1Br	0.241123649	1.670654925	-1.547845075	0.68344	-0.362	1.476	3.1657	0.441942035	-0.163223718	-0.551096414	3.2185	1.10153356
110	13481-25-9	N#Cc1nccnc1C#N	0	2.154861249	-1.809038751	0.40954	0.282	1.354	1.9668	1.623465346	-0.345532734	-0.280903885	3.9639	0.047975726
111	134-81-6	O=C(C(=O)c1ccccc1)c1ccccc1	0.735995659	0.809318977	-2.043281023	0.57491	0.443	0.744	0.6492	1.453245444	-0.232641948	-0.373855071	2.8526	0.489877061
112	134-84-9	Cc1ccc(C(=O)c2ccccc2)cc1	3.443156675	1.138647065	-2.552352935	0.53278	0.797	1.206	1.7833	1.084977959	-0.202916542	-0.451409281	3.691	0.515476064
113	134-96-3	COc1cc(C=O)cc(OC)c1O	0	1.083426318	-2.825673682	0.48917	0.606	1.322	2.3415	0.57123328	-0.275983916	-0.496057288	3.9091	0.908373766
114	135-70-6	c1ccc(-c2ccc(-c3ccc(-c4ccccc4)cc3)cc2)cc1	0	0.908498696	-2.966601304	0.84145	0.051	2.35	0.0001	0.292438787	-0.203712635	-0.749359895	3.8751	0.837990623
115	135822-72-9	O=Cc1ccc(-c2ccc(C=O)cn2)nc1	0.926815198	1.726424127	-1.624175873	0.51901	-0.467	2.936	0.0003	0.696109867	-0.307156801	-0.378464322	3.3506	0.521259989
116	13653-84-4	O=C(O)c1ccc(-c2ccc(-c3ccc(C(=O)O)cc3)cc2)cc1	1.842477899	1.331938746	-2.375461254	0.78099	1.284	0.804	0.0411	0.306428929	-0.395686044	-0.331737087	3.7074	0.857605481
117	136630-36-9	Nc1cc(Br)ccc1-c1ccc(Br)cc1N	0.073182348	0.486065926	-3.553234074	0.6739	0.155	0.892	0.7067	0.592368571	-0.293642036	-0.449025339	4.0393	0.822249839
118	136630-39-2	Brc1ccc2c(c1)[nH]c1cc(Br)ccc12	0	0.906204827	-3.126395173	0.78625	0.323	1.269	0.6756	0.478935579	-0.237596554	-0.547775416	4.0326	0.995242685
119	13677-79-7	O=Cc1cc(O)c(O)c(O)c1	0	1.080130471	-2.837069529	0.47966	0.729	1.346	2.3906	0.571956544	-0.331730156	-0.173738195	3.9172	0.9300652
120	136869-49-3	N#Cc1cccnc1-c1ncccc1C#N	0	2.002359207	-2.054940793	0.49697	0.235	0.742	0.5208	0.685703605	-0.438693749	-0.666901284	4.0573	0.617930554
121	13720-06-4	Brc1ccc2cc(Br)ccc2c1	0	1.324477713	-2.808322287	0.82567	-0.534	2.244	0.0008	0.325366057	-0.119855436	-0.482739135	4.1328	1.457293008
122	13731-82-3	O=C(O)c1cc(Br)c(C(=O)O)cc1Br	0	1.794016059	-2.008083941	0.63451	-0.192	1.733	0.0957	0.671955007	-0.325879536	0.000461818	3.8021	0.393337981
123	137911-28-5	O=Cc1ccc(N(c2ccccc2)c2ccc(-c3ccc(N(c4ccccc4)c4ccc(C=O)cc4)cc3)cc2)cc1	0	0.333246014	-2.630053986	0.62872	1.605	1.222	1.9793	0.296832247	-0.479699572	-0.812381544	2.9633	0.197825879
124	139092-78-7	c1ccc2c(c1)c1ccccc1n2-c1ccc(N(c2ccc(-n3c4ccccc4c4ccccc43)cc2)c2ccc(-n3c4ccccc4c4ccccc43)cc2)cc1	0	0.132290596	-3.461309404	0.63027	-0.908	2.17	1.7271	0.373598285	-0.439813521	-1.549534855	3.5936	0.53218636
125	139585-70-9	N#Cc1ccc(Br)nc1	0	2.343124304	-2.456975696	0.42669	0.504	1.391	2.7779	0.561346249	-0.245790965	-0.237601165	4.8001	0.921365638
126	13958-98-0	N#Cc1ccncc1Br	0	2.120409738	-2.190290262	0.49224	0.431	1.314	3.3323	0.809129769	-0.213762721	-0.274519592	4.3107	0.708801031
127	139669-95-7	O=Cc1sc(Br)nc1Br	0	1.784608443	-1.776291557	0.47078	0.536	1.333	2.6636	0.825146588	-0.166869488	-0.389651849	3.5609	0.795803448
128	139-85-5	O=Cc1ccc(O)c(O)c1	0	1.06869965	-2.85430035	0.4707	0.76	1.321	2.452	0.608493544	-0.400523859	-0.45150464	3.923	0.866949052
129	14118-16-2	c1ccc(N(c2ccccc2)c2ccc(N(c3ccccc3)c3ccccc3)cc2)cc1	0	-0.202024325	-3.716624325	0.70197	-0.317	2.683	0.0017	0.419863908	-0.212277528	-0.47304904	3.5146	0.643047918
130	141244-86-2	NNC(=O)COc1ccc(Br)cc1Br	0	1.180907599	-3.568392401	0.76035	-0.447	1.737	0.9867	0.677611194	-0.367482892	-0.631538591	4.7493	0.308529066
131	142807-63-4	c1csc(-c2ccc(N(c3ccc(-c4cccs4)cc3)c3ccc(-c4cccs4)cc3)cc2)c1	0	0.089099857	-2.997500143	0.69263	0.49	3.395	3.9405	0.249387011	-0.29201344	-0.953522169	3.0866	0.63100855
132	14348-75-5	O=C1c2cc(Br)ccc2-c2ccc(Br)cc21	0.214393857	1.179329085	-1.662970915	0.60736	-0.815	1.193	1.8722	0.588506146	-0.198409833	-0.637046586	2.8423	0.521837359
133	1435-52-5	Fc1cc(Br)ccc1Br	0	1.573875883	-3.471424117	0.84062	-0.527	1.266	0.1948	0.677020604	-0.087450043	-0.346656989	5.0453	1.418329148
134	1435-54-7	Fc1c(Br)cccc1Br	0	1.60323459	-3.50266541	0.92335	-0.29	1.259	0.8548	0.934021374	-0.099562881	-0.382488299	5.1059	1.385563749
135	1443-80-7	CC(=O)c1ccc(C#N)cc1	5.702813762	1.460170338	-2.120729662	0.48073	1.054	1.541	3.4724	1.412128131	-0.287047487	-0.352830224	3.5809	0.438353226
136	14544-47-9	Nc1ccc(-c2nc(-c3ccc(N)cc3)nc(-c3ccc(N)cc3)n2)cc1	0	0.714855665	-2.782044335	0.7175	-1.547	1.584	0.0735	0.335929158	-0.610569054	-1.019675216	3.4969	0.468604709
137	14548-46-0	O=C(c1ccccc1)c1ccncc1	2.405251024	1.35834285	-2.21365715	0.54804	0.525	1.255	1.5599	1.186445011	-0.230500745	-0.386304028	3.572	0.458997895
138	1459-93-4	COC(=O)c1cccc(C(=O)OC)c1	0.023024405	2.084057457	-2.698542542	0.87751	0.46	1.249	0.3945	0.829809973	-0.235557176	-0.524297354	4.7826	1.28867582
139	14609-54-2	O=C(O)c1ccc(-c2c3nc(c(-c4ccc(C(=O)O)cc4)c4ccc([nH]4)c(-c4ccc(C(=O)O)cc4)c4nc(c(-c5ccc(C(=O)O)cc5)c5ccc2[nH]5)C=C4)C=C3)cc1	2.559082606	0.533212345	-1.609887655	0.94268	0.249	2.636	0.0667	0.215229084	-0.771117629	-0.797061836	2.1431	0.663729594
140	14753-51-6	Oc1cc(Br)c(O)cc1Br	0	0.903871253	-3.587528747	0.77648	-0.328	1.457	0.0489	0.601524596	-0.253043865	-0.456441011	4.4914	0.976505256
141	148231-12-3	Brc1ccc(Br)c2nccnc12	1.367501407	1.573244339	-1.946955661	0.63138	-0.457	1.352	3.3532	0.507131993	-0.205703278	-0.622233693	3.5202	0.946535819
142	148-24-3	Oc1cccc2cccnc12	0	0.912334981	-3.004965019	0.72257	0.051	1.477	3.328	0.491729796	-0.300376207	-0.550242814	3.9173	1.193260458
143	149505-72-6	N#Cc1ccc(-c2cccc(N)c2)cc1	0	0.756300525	-2.729299475	0.43883	0.796	2.027	8.4221	0.432612693	-0.353005147	-0.445030832	3.4856	0.618458209
144	149806-06-4	O=Cc1ccc(Br)nc1	0.296580844	1.460457238	-2.189142762	0.48231	0.466	1.647	2.2795	1.416513302	-0.211706635	-0.353442279	3.6496	0.494546874
145	150-78-7	COc1ccc(OC)cc1	0	0.418218026	-4.246781974	0.77109	-0.39	1.273	0.0005	0.638067887	-0.162113769	-0.382719785	4.665	1.304977865
146	15086-94-9	O=C1OC2(c3ccccc31)c1cc(Br)c(O)c(Br)c1Oc1c2cc(Br)c(O)c1Br	23.9158429	1.363415316	-2.813784684	0.30561	-0.947	1.501	6.3977	0.467096791	-0.455552537	-0.807685862	4.1772	0.840850939
147	15155-41-6	Brc1ccc(Br)c2nsnc12	1.285299808	1.598029023	-1.586870977	0.67289	-0.394	1.39	3.1805	0.439632915	-0.173296253	-0.447043166	3.1849	1.089272965
148	15174-69-3	Cc1cc(C=O)ccc1O	0.017167417	1.023628053	-2.906271947	0.4739	0.735	1.386	2.4003	0.864916505	-0.27434019	-0.329277215	3.9299	0.701321161
149	1518-16-7	N#CC(C#N)=c1ccc(=C(C#N)C#N)cc1	0	2.521623146	0.007523146	0.88045	-0.278	2.989	0.0002	-0.138360174	-0.457823673	-0.29613513	2.5141	1.875280236
150	154237-70-4	N#Cc1cnccc1Br	0.050121251	2.142292497	-2.410507503	0.41913	0.546	1.29	2.9901	1.111757001	-0.228199132	-0.287197268	4.5528	0.532992631
151	1562-93-2	O=C(O)c1ccc(N=Nc2ccccc2)cc1	0	0.833386782	-1.633813218	0.54885	1.258	1.783	0.5848	1.291419317	-0.239529917	-0.601016999	2.4672	0.529550456
152	15862-18-7	Brc1ccc(-c2ccc(Br)cn2)nc1	0.024226618	1.584650235	-2.496249765	0.7616	-0.759	2.937	0.0046	0.388255612	-0.129288233	-0.339652968	4.0809	1.155913167
153	15905-32-5	O=C1OC2(c3ccccc31)c1cc(I)c(O)c(I)c1Oc1c2cc(I)c(O)c1I	28.27876862	1.3250629	-2.3974371	0.51088	0.886	2.026	2.1022	0.503422237	-0.476272037	-1.234415005	3.7225	0.095222407
154	1591-30-6	N#Cc1ccc(-c2ccc(C#N)cc2)cc1	0	1.898115552	-2.240784448	0.83443	0.266	1.622	0	0.31243915	-0.384314006	-0.400556978	4.1389	1.187226842
155	1606-67-3	Nc1ccc2ccc3cccc4ccc1c2c34	0	0.29594966	-2.89015034	0.83834	-0.038	2.38	1.4877	0.137812133	-0.253201147	-0.625583351	3.1861	1.205050788
156	1611-92-3	Cc1cc(Br)cc(Br)c1	0	1.397405497	-3.679294503	0.92	-0.3	1.332	0.6032	0.867791889	-0.089715384	-0.421993348	5.0767	0.603010844
157	1612793-07-3	C=Cc1ccc2c(=C(C#N)C#N)c3ccccc3c(=C(C#N)C#N)c2c1	0	1.779416927	-0.784383073	0.55184	0.196	2.221	6.161	0.283434783	-0.527618127	-0.647311907	2.5638	0.321076197
158	1620-98-0	CC(C)(C)c1cc(C=O)cc(C(C)(C)C)c1O	0	1.00117885	-2.93162115	0.46392	0.698	1.323	2.4075	0.781586487	-0.215302989	-0.446133977	3.9328	0.765278057
159	16297-07-7	N#Cc1c(F)c(F)nc(F)c1F	0.002010735	2.379861174	-1.965338826	0.74036	0.211	1.406	1.6532	0.752923614	-0.190406527	-0.158759441	4.3452	1.247192983
160	1633-14-3	O=C1C=C(Br)C(=O)C=C1Br	0	2.11722495	-0.57977505	0.59186	-0.397	1.354	0.0004	0.908200647	-0.216766304	-0.269101389	2.697	0.627889047
161	16372-96-6	Brc1cc(Br)cc(-c2ccccc2)c1	0	1.617532334	-3.080267666	0.8978	-0.231	2.032	0.7998	0.334609114	-0.118707391	-0.513677879	4.6978	1.487525307
162	16433-88-8	Brc1ccc2c(c1)Cc1cc(Br)ccc1-2	0	1.122944845	-3.089555155	0.79331	-0.447	0.991	0.3222	0.330912257	-0.15010515	-0.535604019	4.2125	1.202297276
163	1646-54-4	Cc1c(C)c(Br)c(C)c(C)c1Br	0	1.090612694	-3.858387306	0.94473	-0.164	1.494	0.0906	0.775023215	-0.069826917	-0.598476344	4.949	0.636596935
164	165190-76-1	c1csc(-c2ccc(-c3cccs3)c3nsnc23)c1	0.8399506	0.619668086	-1.639331914	0.69081	-0.929	1.402	2.5604	0.277951132	-0.173198564	-0.886688387	2.259	0.799912082
165	165617-59-4	Brc1c2c(c(Br)c3nsnc13)N=S=N2	0	1.411103564	-0.590396436	0.75344	0.421	1.591	0.0003	0.188576174	-0.253911906	-0.708029193	2.0015	1.264410334
166	16582-93-7	N#Cc1cc(F)c(F)c(F)c1F	0	2.170909136	-2.630490864	0.84074	0.197	1.513	1.1457	0.806832848	-0.186922828	-0.248379272	4.8014	1.451902041
167	1667-12-5	OCc1ccc(-c2ccc(CO)cc2)cc1	0.00977332	1.137898174	-3.444401826	0.85119	-0.024	1.043	0.0058	0.357649797	-0.295072888	-0.49813692	4.5823	1.294327771
168	1689-64-1	OC1c2ccccc2-c2ccccc21	0	1.053629619	-3.313270381	0.84871	0.036	1.107	0.2618	0.410557981	-0.182710981	-0.413868549	4.3669	1.206093416
169	17132-78-4	N#Cc1cccnc1C#N	0	2.467589364	-1.951110636	0.42157	0.632	1.304	2.6215	0.993902921	-0.368977282	-0.293359022	4.4187	0.628323121
170	171408-84-7	Brc1ccc2c(c1)C1(c3ccccc3-c3ccccc31)c1cc(Br)ccc1-2	0	1.007383105	-2.980816895	0.5837	-0.491	1.612	4.1197	0.340462854	-0.20587743	-0.455118789	3.9882	0.97270547
171	1714-29-0	Brc1ccc2ccc3cccc4ccc1c2c34	0.368647125	0.905010552	-2.511089448	0.90418	-0.071	2.149	0.2329	0.099998606	-0.132655632	-0.711240005	3.4161	1.346548187
172	172377-05-8	Nc1cc(Br)c(F)cc1Br	0	0.810606123	-3.567093877	0.73538	-0.263	1.392	1.4998	0.617610044	-0.180395409	-0.483812753	4.3777	0.280377344
173	17432-38-1	Cc1c(C)c(C)c(C=O)c(C)c1C	0.844186464	0.752758532	-2.872241468	0.48984	0.598	1.453	2.3284	0.99446267	-0.164393531	-0.514235864	3.625	0.45316763
174	175278-16-7	N#Cc1ccc(C#N)c(OC(F)(F)F)c1	0.152645144	2.513956355	-1.926343645	0.80141	0.441	1.634	0.7758	0.554895212	-0.308819574	-0.333001068	4.4403	1.452387518
175	175278-32-7	CCc1cc(C#N)ccc1C#N	0	2.385984145	-2.164515855	0.81493	0.506	1.523	0.5213	0.531992164	-0.29593535	-0.232616172	4.5505	1.501582882
176	1761-61-1	O=Cc1cc(Br)ccc1O	10.49110383	1.265572752	-2.465027248	0.47965	0.675	1.241	2.4549	0.706378794	-0.285886816	-0.468484607	3.7306	0.583225779
177	17788-94-2	Brc1ccc(-c2ccc(-c3ccc(Br)cc3)cc2)cc1	0	1.109715443	-2.912384557	0.8346	-0.324	3.848	0.0033	0.304298602	-0.182612313	-0.661941293	4.0221	0.943968977
178	17823-40-4	N#Cc1c(F)c(F)c(Br)c(F)c1F	0	2.252170717	-2.286529283	0.79752	0.29	1.551	1.1588	0.744388045	-0.179322195	-0.273074516	4.5387	0.205588719
179	1802-29-5	N#Cc1ccc(-c2ccc(C#N)cn2)nc1	0	2.112807681	-1.715692319	0.48916	0.816	1.734	0.0008	0.422912232	-0.35441442	-0.480475694	3.8285	0.886139468
180	181058-08-2	CCc1c(CBr)c(CC)c(CBr)c(CC)c1CBr	0	1.433356562	-2.910343438	0.88023	0.42	1.357	0.3304	0.710224	-0.241045315	-0.41797279	4.3437	0.889437532
181	1829-33-0	O=Cc1cc(O)cc(Cl)c1	0.000188924	1.365200382	-2.409099618	0.48539	0.657	1.267	2.3583	0.820227922	-0.248513864	-0.383640593	3.7743	0.591069654
182	1835-49-0	N#Cc1c(F)c(F)c(C#N)c(F)c1F	8.13	2.535499124	-1.597200876	0.73649	0.56	1.142	0.0001	0.677602238	-0.272650069	-0.252273279	4.1327	1.088913014
183	1835-65-0	N#Cc1c(F)c(F)c(F)c(F)c1C#N	4.239810161	2.623126791	-1.789973209	0.85666	0.117	1.583	0.9349	0.723322975	-0.292725723	-0.280593595	4.4131	1.302182748
184	18511-71-2	Brc1ccnc(-c2cc(Br)ccn2)c1	0	1.853949433	-2.486350567	0.50828	0.28	1.81	0.0031	0.504421893	-0.136405077	-0.364457524	4.3403	1.036893117
185	18791-99-6	N#Cc1cc(Br)cs1	0	1.972939418	-2.536360582	0.71583	-0.24	1.757	2.9945	0.424622167	-0.198821268	-0.273592179	4.5093	0.527223291
186	18853-32-2	N#Cc1cscc1C#N	0	2.10479298	-3.03800702	0.90746	0.068	1.622	0.0956	0.834725455	-0.366257295	-0.329421319	5.1428	1.847734727
187	188813-02-7	O=Cc1cc(F)cc(Br)c1	0.079487243	1.451535813	-2.291364187	0.48448	0.657	1.209	2.4083	1.145392627	-0.1580084	-0.321029329	3.7429	0.514318877
188	189367-54-2	CCCCCCC1(CCCCCC)c2cc(Br)ccc2-c2ccc(Br)cc21	0	1.078243316	-3.064956684	0.79589	-0.381	1.326	0.2895	0.356077161	-0.141715362	-0.636041196	4.1432	1.179419376
189	1897-41-2	N#Cc1c(Cl)c(Cl)c(C#N)c(Cl)c1Cl	1.435767724	2.471448789	-1.299351211	0.68582	0.013	1.371	0.0004	0.532933494	-0.25627684	-0.496692751	3.7708	0.939832859
190	191-07-1	c1cc2ccc3ccc4ccc5ccc6ccc1c1c2c3c4c5c61	0	0.490625671	-2.743374329	0.9674	0.026	2.23	0	0.556129131	-0.17073937	-0.940434512	3.234	0.58208383
191	19485-35-9	Cn1cnc(C#N)c1C#N	0.039720176	2.416733893	-2.465166107	0.84112	0.091	1.486	1.0297	0.41846839	-0.452202091	-0.361859249	4.8819	1.821649893
192	1951-36-6	O=Cc1cc(O)c(C=O)cc1O	0	1.2102021	-1.8298979	0.65768	0.58	0.734	0.0005	0.532055489	-0.3939578	-0.586186883	3.0401	0.997677579
193	196207-58-6	CCCCCCCCC1(CCCCCCCC)c2cc(B3OC(C)(C)C(C)(C)O3)ccc2-c2ccc(B3OC(C)(C)C(C)(C)O3)cc21	0.034173333	1.085540776	-2.848259224	0.80071	0.406	2.235	0.0798	0.35696486	-0.275866255	-0.162648013	3.9338	1.12840744
194	198084-12-7	O=Cc1ccc(-c2cncnc2)cc1	2.579244814	1.469995126	-2.222304874	0.47129	1.168	1.635	3.2216	0.890412095	-0.284646416	-0.407125106	3.6923	0.680168866
195	19814-75-6	CC1(C)c2ccccc2Oc2ccccc21	0.013211651	0.689266821	-3.963133179	0.78961	0.345	1.25	0.3636	0.549656004	-0.123976941	-0.512417467	4.6524	0.964538815
196	198-55-0	c1cc2cccc3c4cccc5cccc(c(c1)c23)c54	1.251359068	0.413197968	-2.262502032	0.89742	0.011	1.861	0	0.133446093	-0.166623307	-0.780114043	2.6757	1.12356674
197	198964-46-4	CCCCCCCCC1(CCCCCCCC)c2cc(Br)ccc2-c2ccc(Br)cc21	0	1.088554525	-3.061545475	0.79362	-0.39	1.343	0.2757	0.346970596	-0.144256897	-0.366370982	4.1501	1.184400676
198	20248-86-6	BrCc1ccc(-c2ccc(CBr)cc2)cc1	0	1.438017033	-2.665782967	0.80044	0.753	1.007	0.3306	0.283656133	-0.26751293	-0.640536094	4.1038	0.954639888
199	203450-08-2	Fc1ccc(-c2nc(-c3ccccc3)nc(-c3ccccc3)n2)cc1	0	1.713403264	-2.320196736	0.78605	-0.764	2.481	2.178	0.503918833	-0.180914056	-0.969855118	4.0336	0.810031149
200	20577-26-8	N#Cc1cccnc1Br	0	2.314506857	-2.396693143	0.40683	0.394	1.411	2.9445	0.639410981	-0.26527861	-0.349042002	4.7112	0.859601974
201	206201-64-1	N#Cc1ccc(C=O)nc1	0.138821893	1.679256425	-1.679443575	0.50582	0.787	1.702	2.8973	1.470459315	-0.27320635	-0.196837628	3.3587	0.487894391
202	20730-07-8	N#Cc1ccc(C#N)nc1	0.061670038	2.486707839	-1.797992161	0.44224	0.83	1.023	2.1266	0.933831385	-0.347834538	-0.190236023	4.2847	0.636962927
203	208-96-8	C1=Cc2cccc3cccc1c23	0	0.792549403	-2.317350597	0.6817	0.396	1.615	1.1323	0.662960242	-0.116705429	-0.437122103	3.1099	0.823693561
204	20964-63-0	N#Cc1c(O)[nH]c(=O)c(C#N)c1-c1ccccc1	0	1.700994329	-2.149805671	0.71046	-0.117	1.607	1.484	0.422862613	-0.600042744	-0.580544545	3.8508	1.34172825
205	210992-28-2	N#Cc1cc(N)cc(F)c1	0	1.047629808	-3.035470192	0.68415	0.173	1.473	3.0501	0.564815975	-0.314067682	-0.297433086	4.0831	1.156247729
206	21240-56-2	Cn1c2ccccc2c2cc(C=O)ccc21	2.489410827	0.859976686	-2.921823314	0.62787	-0.181	2.196	6.1358	0.338470338	-0.27929145	-0.62264993	3.7818	0.661675005
207	214360-73-3	CC1(C)OB(c2ccc(N)cc2)OC1(C)C	0.07610268	0.70005552	-4.02604448	0.77614	-0.313	1.531	1.2705	0.45163117	-0.317049686	-0.33793245	4.7261	1.391061629
208	21524-39-0	N#Cc1cccc(F)c1F	0	2.058873615	-2.763026385	0.81655	0.324	1.442	1.4441	0.794500538	-0.205488853	-0.268333325	4.8219	1.357267535
209	217-59-4	c1ccc2c(c1)c1ccccc1c1ccccc21	0.021968629	0.789014252	-3.229085748	0.96171	0.031	2.07	0.0013	0.67344573	-0.164537643	-0.671477436	4.0181	0.770067409
210	218-01-9	c1ccc2c(c1)ccc1c3ccccc3ccc21	0	0.820920273	-2.904379727	0.88203	0.106	2.2	0	0.287406844	-0.162404358	-0.679932474	3.7253	1.118533113
211	21943-15-7	O=c1[nH]cc(Br)nc1Br	0	1.543007879	-2.205092121	0.71138	-0.654	1.626	0.9175	0.450902098	-0.375198656	-0.648094951	3.7481	1.471639622
212	21988-87-4	Cc1c(CBr)c(C)c(CBr)c(C)c1CBr	0	1.380023234	-2.981276766	0.88201	0.406	1.038	0.2409	0.728914623	-0.256339698	-0.211716407	4.3613	0.89744745
213	220616-68-2	O=c1cc(Br)[nH]c(Br)c1	0	1.00359086	-3.33710914	0.43591	0.509	1.396	3.0154	1.043657619	-0.309159824	-0.517777519	4.3407	0.645770952
214	22112-84-1	Nc1ccc(-c2c3nc(c(-c4ccc(N)cc4)c4ccc([nH]4)c(-c4ccc(N)cc4)c4nc(c(-c5ccc(N)cc5)c5ccc2[nH]5)C=C4)C=C3)cc1	0	0.133513315	-1.902686685	0.85857	-0.733	2.607	0.1445	0.154463394	-0.82503682	-1.019838428	2.0362	0.613602842
215	22115-41-9	N#Cc1ccccc1CBr	0	2.178093813	-2.547006187	0.81001	0.05	1.306	1.0662	0.57128403	-0.272211777	-0.301295476	4.7251	1.155266626
216	221241-11-8	Nc1c(Br)cnc(Br)c1N	0	0.892977156	-3.797822844	0.83737	-0.22	1.381	1.5068	0.618196196	-0.259799887	-0.499365762	4.6908	1.043984926
217	221295-04-1	N#Cc1cnc(Br)cn1	0.721289287	2.105621781	-1.936278219	0.57139	0.07	1.558	0.7268	1.065025354	-0.232291984	-0.223122496	4.0419	0.636332985
218	2215-76-1	O=Cc1ccc(Oc2ccc(C=O)cc2)cc1	2.415047438	1.396967849	-2.429732151	0.49523	0.509	1.739	2.4889	0.572133776	-0.314764971	-0.505392652	3.8267	0.55108352
219	2233-18-3	Cc1cc(C=O)cc(C)c1O	0.007598964	1.000905371	-2.933994629	0.46859	0.732	1.39	2.412	0.799565733	-0.261196126	-0.380040144	3.9349	0.744114196
220	223463-14-7	OB(O)c1ccc(Br)nc1	0	1.911118258	-3.111081742	0.50623	0.208	1.185	2.0992	0.777102461	-0.374122177	-0.609009471	5.0222	1.498322206
221	2237-30-1	N#Cc1cccc(N)c1	0	0.912344559	-3.159955441	0.67966	0.174	1.602	3.0224	0.559072376	-0.319552663	-0.283154464	4.0723	1.163505555
222	2243-62-1	Nc1cccc2c(N)cccc12	0	0.161839149	-3.649560851	0.85418	-0.11	0.753	0.0443	0.32748001	-0.314528668	-0.393276898	3.8114	1.348436134
223	22856-30-0	N#Cc1cc2ccccc2cc1C#N	0.40097945	1.675384091	-2.251815909	0.89088	0.175	2.266	1.9488	0.418955012	-0.374865481	-0.436740442	3.9272	1.266698097
224	2373-98-0	Nc1ccc(-c2ccc(N)c(O)c2)cc1O	0.103952853	0.066913639	-4.004886361	0.76233	-0.601	1.103	0.0566	0.306723099	-0.481853211	-0.35551494	4.0718	1.195115316
225	23872-19-7	O=C1Cc2cc(Br)cc(Br)c2N1	0	1.050283102	-3.479816898	0.75946	-0.455	1.622	0.7642	0.611806297	-0.239711417	-0.432160665	4.5301	0.935974841
226	23912-79-0	O=c1c2ccccc2c(=O)c2cc3c(=O)c4ccccc4c(=O)c3cc12	0	1.944975717	-0.872524283	0.57408	-0.144	2.375	0.0007	0.940449647	-0.353294104	-0.976887269	2.8175	0.346331277
227	2420-16-8	O=Cc1ccc(O)c(Cl)c1	0.066138679	1.210615712	-2.679184288	0.47601	0.724	1.376	2.4186	0.941059042	-0.309578144	-0.369258686	3.8898	0.605230034
228	2437-49-2	Oc1c(Br)cc(Br)c(O)c1Br	0	0.901594626	-3.233105374	0.51091	0.662	1.913	0.8093	0.866349179	-0.183245248	-0.432441919	4.1347	0.317993157
229	2448-55-7	N#CC1=C(C#N)SC(C#N)=C(C#N)S1	0	2.025290015	-0.747009985	0.60618	0.388	0.882	1.2149	0.822243341	-0.442177366	-0.41419088	2.7723	0.689502233
230	24650-42-8	COC(OC)(C(=O)c1ccccc1)c1ccccc1	1.183641776	0.946007317	-2.580392683	0.52871	0.246	1.284	2.0904	1.221294044	-0.253011484	-0.414323835	3.5264	0.412321074
231	24677-78-9	O=Cc1cccc(O)c1O	0	0.979434352	-2.497465648	0.59877	0.155	1.41	3.371	0.629909914	-0.17122784	0.095815019	3.4769	1.188337281
232	2475-45-8	Nc1ccc(N)c2c1C(=O)c1c(N)ccc(N)c1C2=O	0	-0.036232959	-1.964232959	0.7374	-0.298	1.272	0.0768	0.227891489	-0.421118623	-0.701751065	1.928	0.925940157
233	24964-64-5	N#Cc1cccc(C=O)c1	0.203955402	1.481118102	-2.271581898	0.47728	0.686	1.156	2.4477	1.638111296	-0.295724299	-0.332577963	3.7527	0.512127605
234	25373-20-0	O=Cc1sc(C=O)c(Br)c1Br	0.166938489	1.901427934	-1.310772066	0.47294	0.469	1.873	3.6394	0.826396655	-0.237849619	-0.522460385	3.2122	0.424184166
235	25570-02-9	Cc1cc(C)cc(-c2cc(C)cc(C)c2)c1	0	1.141308996	-3.605191004	0.8585	0.035	1.373	0	0.312414879	-0.115330605	-0.452003001	4.7465	1.387840764
236	25813-25-6	O=c1c(Br)c[nH]cc1Br	0.000383959	1.157081386	-3.458518614	0.42504	0.559	1.273	3.1272	0.683247741	-0.541707322	-0.362660743	4.6156	0.745516422
237	25871-69-6	O=C(c1ccccc1)c1cc(C(=O)c2ccccc2)cc(C(=O)c2ccccc2)c1	14.1912606	1.478985177	-2.132614823	0.55148	-0.061	2.08	0.6733	0.955436835	-0.390036978	-0.789173809	3.6116	0.488873862
238	266349-83-1	c1ccc(-c2nc(-c3ccccc3)nc(-c3ccc(-c4ccc(-c5nc(-c6ccccc6)nc(-c6ccccc6)n5)cc4)cc3)n2)cc1	0	1.462068497	-1.995431503	0.749	1.629	4.43	0.0002	0.314520882	-0.341814473	-1.899272656	3.4575	0.77023299
239	2672-58-4	COC(=O)c1cc(C(=O)OC)cc(C(=O)OC)c1	0.019848107	2.120718616	-2.538981384	0.91894	0.325	1.497	0.0006	1.000294754	-0.308100189	-0.678341734	4.6597	1.051478891
240	2674-34-2	COc1cc(Br)c(OC)cc1Br	0	1.10023999	-3.60336001	0.80408	-0.374	1.434	0.6726	0.588964652	-0.18782627	-0.625705226	4.7036	0.299683217
241	269410-08-4	CC1(C)OB(c2cn[nH]c2)OC1(C)C	0	1.834247112	-4.485652888	0.76753	0.135	1.559	1.305	0.605659065	-0.294488961	-0.388950681	6.3199	1.827200944
242	273-13-2	c1ccc2nsnc2c1	0	1.706675519	-2.002424481	0.75834	0.185	1.513	2.9322	0.442678111	-0.135531267	-0.373970224	3.7091	1.47023677
243	2789-89-1	Brc1ccc(C#Cc2ccc(Br)cc2)cc1	0	1.081338578	-2.609161422	0.83277	-0.169	1.978	0	0.343122701	-0.148144848	-0.556695439	3.6905	1.019488498
244	27913-96-8	O=Cc1ccc(N2CCS(=O)(=O)CC2)cc1	2.729556756	0.991454593	-2.887845407	0.54259	0.07	1.926	1.6443	0.367293301	-0.579919606	-0.537676731	3.8793	0.89287187
245	27913-99-1	CN1CCN(c2ccc(C=O)cc2)CC1	0.408884775	0.554200507	-2.979899493	0.46175	-0.335	2.365	8.9698	0.324249493	-0.28671706	-0.420257582	3.5341	0.093229696
246	27973-29-1	Brc1ccc2ccc3c(Br)ccc4ccc1c2c43	0.160484088	0.978219022	-2.330680978	0.89412	-0.197	2.46	0.0025	0.103942879	-0.126832958	-0.809576158	3.3089	1.285296367
247	2872-52-8	CCN(CCO)c1ccc(N=Nc2ccc([N+](=O)[O-])cc2)cc1	0	0.791585514	-1.469214486	0.57084	0.348	3.569	10.3307	0.069823627	-0.414940488	-0.615696568	2.2608	0.551739312
248	288071-87-4	Brc1ccc(-c2ccc(-c3ccc(Br)s3)c3nsnc23)s1	0.17433979	0.697671139	-1.519628861	0.704	-1.113	1.465	2.4533	0.252858003	-0.150496448	-0.983230336	2.2173	0.780828798
249	2893-33-6	N#Cc1cccc(C#N)n1	0	2.622279087	-2.230220913	0.53535	0.681	1.189	1.1179	0.821147045	-0.379550913	-0.315809452	4.8525	1.028117119
250	290-87-9	c1ncncn1	0	1.625995353	-2.980604647	0.58224	-0.152	1.184	0.0006	1.792036813	-0.152882009	-0.199618632	4.6066	0.28659801
251	29181-50-8	N#Cc1ccnc(C#N)c1	0	2.479735646	-1.890764354	0.49278	0.865	1.292	2.6492	1.065791936	-0.341470413	-0.266659365	4.3705	0.637897336
252	2920-38-9	N#Cc1ccc(-c2ccccc2)cc1	0	1.583442007	-2.682157993	0.75157	0.033	2.711	4.0954	0.347862143	-0.241556697	-0.394360368	4.2656	1.237085917
253	29261-33-4	N#CC(C#N)=c1c(F)c(F)c(=C(C#N)C#N)c(F)c1F	0	2.726605857	0.379205857	0.44679	1.347	0.904	0.0003	-0.089035436	-0.529623872	-0.423201093	2.3474	1.251739392
254	2948-46-1	CC(C)(O)c1ccc(C(C)(C)O)cc1	0.001184287	0.960003897	-4.377296103	0.95823	-0.014	1.206	0.0532	0.995201952	-0.254207665	-0.46590599	5.3373	1.529353946
255	3029-19-4	O=Cc1ccc2ccc3cccc4ccc1c2c34	10.29745326	1.04025798	-2.02124202	0.80176	0.152	2.578	2.5677	0.12989351	-0.224648819	-0.776916012	3.0615	1.178931641
256	3029-30-9	N#Cc1ccc(C#N)c2ccccc12	0.065394	1.759946394	-1.750053606	0.75953	0.255	1.522	2.755	0.365060306	-0.290728223	-0.447691808	3.51	1.190109961
257	3029-32-1	O=C1c2cc3ccccc3cc2C(=O)c2cc3ccccc3cc21	6.858031708	1.365846169	-1.672153831	0.63113	-1.174	3.313	0.0029	0.364973884	-0.281530913	-0.926272234	3.038	0.504294832
258	3032-92-6	C#Cc1ccc(C#N)cc1	0	2.003543131	-2.483856869	0.81198	0.004	2.516	2.5274	0.329724138	-0.226626183	-0.306880028	4.4874	1.639919498
259	30363-03-2	Brc1ccc(-c2nc(-c3ccc(Br)cc3)nc(-c3ccc(Br)cc3)n2)cc1	0.031077673	1.771660836	-2.113939164	0.78265	-1.447	2.772	0.0274	0.43439415	-0.188984655	-1.077157839	3.8856	0.944876474
260	3073-05-0	c1ccc(-c2ccc(-c3ccc(-c4ccc(-c5ccccc5)cc4)cc3)cc2)cc1	0	0.837425981	-2.854874019	0.83764	-0.033	4.977	0	0.271091968	-0.248310187	-0.930947818	3.6923	0.72899753
261	31274-51-8	c1ccc(-c2ccc(-c3nc(-c4ccc(-c5ccccc5)cc4)nc(-c4ccc(-c5ccccc5)cc4)n3)cc2)cc1	0.102514771	1.381521846	-2.199278154	0.68107	-1.731	3.645	3.8214	0.317980641	-0.315077194	-1.515242021	3.5808	0.79545732
262	3163-76-6	O=Cc1cc(C=O)cc(C=O)c1	0.092330502	1.63230753	-2.02129247	0.49792	-0.722	2.188	0.0199	1.306536799	-0.315091452	-0.331898317	3.6536	0.501040905
263	316800-46-1	O=Cc1cc(Br)nc(Br)c1	0.106872467	1.770639207	-1.766360793	0.49421	0.563	1.326	2.4673	0.949434788	-0.213654148	-0.428707667	3.537	0.524453725
264	3217-47-8	O=Cc1c(F)c(F)c(C=O)c(F)c1F	0.177282459	1.853333181	-1.435766819	0.53162	-0.668	2.985	0.0083	0.988426155	-0.263166714	-0.462737532	3.2891	0.412620969
265	3218-36-8	O=Cc1ccc(-c2ccccc2)cc1	4.669169563	1.328042786	-2.422757214	0.48078	1.035	1.609	2.9677	0.559732509	-0.20710183	-0.512484309	3.7508	0.821103617
266	32364-72-0	O=Cc1ccc(-c2ccc(C=O)s2)s1	1.184793787	1.438646983	-1.604653017	0.8235	0.489	1.885	0.0008	0.188769777	-0.299112324	-0.540529513	3.0433	1.279871795
267	32446-66-5	N#Cc1ccc(C(=O)c2ccc(C#N)cc2)cc1	4.6549982	1.73237687	-1.71622313	0.53726	1.267	1.268	2.2015	1.031829417	-0.427456761	-0.389681208	3.4486	0.570341419
268	325129-69-9	CC1(C)c2cc(B3OC(C)(C)C(C)(C)O3)ccc2-c2ccc(B3OC(C)(C)C(C)(C)O3)cc21	0.014211834	1.10933877	-2.85486123	0.80768	0.41	1.015	0.0565	0.343178175	-0.278780857	-0.749685637	3.9642	1.139630197
269	327-51-5	Fc1cc(Br)c(F)cc1Br	0	1.631290844	-3.275809156	0.80809	-0.477	1.699	0.0099	0.656816552	-0.08536212	-0.344018262	4.9071	1.374150514
270	32779-37-6	Brc1cnc(Br)nc1	0	1.798408052	-2.585691948	0.517	-0.302	1.128	1.2415	1.047793583	-0.163589982	-0.373944596	4.3841	0.484398692
271	332411-18-4	Cc1cccc(N(c2ccc(C=O)cc2)c2cccc(C)c2)c1	0.244743008	0.424484944	-2.766015056	0.62027	-0.006	2.404	5.8841	0.346899121	-0.251654728	-0.556810102	3.1905	0.303142073
272	333432-27-2	Brc1cnc(Br)c2nsnc12	0	1.949321999	-1.253978001	0.664	-0.425	1.425	3.5417	0.465429508	-0.191455986	-0.511060747	3.2033	1.0735032
273	3354-82-3	Oc1c(Br)c(O)c(Br)c(O)c1Br	0	0.880089837	-3.181410163	0.54197	0.64	1.884	1.4188	0.880288682	-0.274259427	-0.561210284	4.0615	0.200664017
274	3363-97-1	O=C(C(=O)c1ccc(C(=O)C(=O)c2ccccc2)cc1)c1ccccc1	0.005974487	1.249250005	-1.442449995	0.59313	-0.251	0.833	0.4083	1.088748766	-0.36240091	-0.463887024	2.6917	0.466275422
275	3365-85-3	Nc1ccc(-c2ccc(-c3ccc(N)cc3)cc2)cc1	0	0.277151388	-3.466448612	0.76886	-1.213	0.776	0.0494	0.269505952	-0.406434807	-0.604457646	3.7436	0.879328071
276	34374-88-4	O=Cc1c(O)c(C=O)c(O)c(C=O)c1O	1.030328153	1.474096959	-2.246603041	0.47034	0.608	1.404	2.6987	0.956913626	-0.435758248	-0.868189332	3.7207	0.491406554
277	344-03-6	Fc1c(F)c(Br)c(F)c(F)c1Br	0	1.51791937	-3.26098063	0.64721	0.235	2.512	0.0102	1.249269086	-0.078095887	-0.324983082	4.7789	0.792336184
278	3460-18-2	O=[N+]([O-])c1cc(Br)ccc1Br	0	1.74652329	-1.78407671	0.43814	-0.754	1.348	4.1482	0.792609165	-0.195787208	-0.539980995	3.5306	0.354288677
279	34824-20-9	OCc1cccc2cc3cccc(CO)c3cc12	0.00242048	0.685333245	-2.470166755	0.89979	0.057	2.392	0.1803	0.221126271	-0.284587721	-0.539774426	3.1555	1.316525688
280	35094-87-2	O=Cc1cc(O)c(O)cc1O	0	0.894167266	-2.907932734	0.6953	0.084	1.696	2.4033	0.511790438	-0.395807189	-0.093685525	3.8021	0.9706302
281	3526-27-0	N#CCc1ccccc1-c1ccccc1CC#N	0	1.583946677	-3.609153323	0.95606	0.117	1.693	0.383	0.753653638	-0.407505027	-0.222544119	5.1931	0.587895375
282	35590-37-5	N#Cc1cncc(Br)c1	0	2.135022814	-2.420877186	0.41922	0.361	1.293	2.7355	0.769418622	-0.212748012	-0.28031318	4.5559	0.657524873
283	35747-58-1	N#Cc1cc(N)ccc1Cl	0	0.986986495	-2.887113505	0.6793	-0.075	1.691	2.4787	0.516709436	-0.34744743	-0.416563931	3.8741	1.13938086
284	36023-58-2	N#Cc1nc(N)c(N)nc1C#N	0	1.534433093	-2.323366907	0.79237	-0.075	1.844	3.6194	0.323135128	-0.706973193	-0.544833113	3.8578	1.454551252
285	3638-73-1	Nc1cc(Br)ccc1Br	0	0.802804496	-3.780495504	0.75746	-0.232	1.367	1.6076	0.647650922	-0.175633159	-0.429567584	4.5833	0.309974531
286	36393-42-7	Cc1ccc(-c2ccc(C=O)cc2)cc1	3.393516314	1.311925462	-2.445274538	0.48454	0.958	1.682	2.9042	0.396573325	-0.207586817	-0.525573154	3.7572	0.886378165
287	365564-05-2	CC1(C)OB(c2cc(B3OC(C)(C)C(C)(C)O3)cc(B3OC(C)(C)C(C)(C)O3)c2)OC1(C)C	0.012436836	1.40118529	-3.41671471	0.93426	0.189	1.202	0.0009	0.999380694	-0.342041143	-0.914444874	4.8179	1.210994824
288	366-18-7	c1ccc(-c2ccccn2)nc1	0	1.45062257	-2.87157743	0.51363	0.29	1.734	0.004	0.561178048	-0.155581125	-0.224068608	4.3222	1.022711703
289	374633-37-1	Cc1cc(C#N)cnc1Br	0	2.262641897	-2.507658103	0.43252	0.451	1.435	2.8326	0.502077677	-0.24178519	-0.288452735	4.7703	0.952813738
290	3759-28-2	N#CCc1ccccc1C#N	0	2.16528251	-2.79711749	0.86799	0.33	1.455	1.0432	0.678516068	-0.316112747	-0.380679485	4.9624	1.556838855
291	37895-73-1	COc1cc(Br)c(Br)cc1OC	0	0.787582123	-3.650817877	0.53153	-0.188	1.708	3.5059	0.860812373	-0.181042765	-0.618710863	4.4384	0.298436123
292	38172-19-9	N#CC(C#N)=C1CC(=C(C#N)C#N)c2ccccc21	0	2.241496248	-0.974903752	0.81824	-0.29	1.902	0.2508	0.181857731	-0.517190322	-0.349183324	3.2164	1.182839782
293	38707-70-9	O=Cc1cccc2cccnc12	1.44522367	1.21046397	-2.14923603	0.47471	0.332	1.452	2.4213	0.966282677	-0.223847909	-0.463676895	3.3597	0.519092147
294	39095-25-5	Cc1cc(C#N)c(C)cc1C#N	0	2.176386443	-2.172613557	0.79396	0.468	0.993	0	0.503081026	-0.294124139	-0.323347767	4.349	1.405691757
295	3958-03-0	Brc1sc(Br)c(Br)c1Br	0	1.112986403	-2.880713597	0.62718	0.481	1.431	0.8504	0.836874466	-0.074099091	-0.444804472	3.9937	0.656007299
296	39718-11-1	N#Cc1ccc2ccc(C#N)cc2c1	0.04887679	1.852233906	-2.189966094	0.89047	0.202	1.329	1.0779	0.264203058	-0.360202917	-0.416995288	4.0422	1.450498047
297	39891-09-3	N#CCc1ccc(Cl)nc1	0	2.044234173	-3.162965827	0.82918	-0.28	1.477	0.8512	0.800815472	-0.324911875	-0.35064671	5.2072	0.745515524
298	39909-72-3	O=Cc1ccc(C=O)c([N+](=O)[O-])c1	0	1.94506173	-1.31793827	0.49778	0.782	1.56	3.5185	1.263823405	-0.329958972	-0.431006626	3.263	0.077583389
299	400748-29-0	N#Cc1cccc(-c2cccc(C=O)c2)c1	1.088584052	1.285827596	-2.506872404	0.48932	0.605	1.124	2.3367	0.890672218	-0.330581648	-0.513980326	3.7927	0.507797063
300	40200-69-9	O=Cc1ccc(/C=C/c2ccccc2)cc1	0.017035314	1.070942224	-2.138857776	0.76275	0.355	3.314	4.7299	0.232812694	-0.245698719	-0.577757538	3.2098	1.154063016
301	40307-15-1	O=S1(=O)c2ccc(Br)cc2-c2cc(Br)ccc21	0.009003269	1.924330391	-2.165369609	0.83852	-0.366	1.353	0.6801	0.371800529	-0.3583984	-0.841994688	4.0897	1.037548093
302	405-05-0	O=Cc1ccc(O)c(F)c1	0.03819782	1.150637161	-2.739362839	0.47426	0.745	1.387	2.423	0.95652154	-0.297465333	-0.374681182	3.89	0.676381379
303	405224-22-8	N#Cc1cc(Br)c[nH]c1=O	1.987938405	1.557318383	-2.105281617	0.64852	-0.421	1.406	1.0664	0.435685185	-0.47851833	-0.331453609	3.6626	1.301002185
304	40718-08-9	N#Cc1cc(Br)cc(Br)c1O	0.31009375	1.613242787	-2.565157213	0.72111	-0.274	1.58	1.458	0.566185398	-0.256998211	-0.344571566	4.1784	1.034518115
305	40888-26-4	C#Cc1ccccc1C#N	0	1.861400331	-2.586999669	0.75987	0.018	1.385	1.9116	0.523822371	-0.24750027	-0.316706703	4.4484	1.41061303
306	4151-80-8	OB(O)c1ccc(-c2ccc(B(O)O)cc2)cc1	0	1.458772587	-2.926527413	0.83752	0.417	2.897	0.1741	0.336605214	-0.471557108	-0.485228189	4.3853	1.2277787
307	4175-78-4	Brc1cnc(Br)s1	0	1.755714576	-3.022585424	0.76883	-0.55	1.764	1.2202	0.49872836	-0.095314653	-0.298454053	4.7783	0.587908572
308	42289-52-1	N#Cc1ccc(-c2ccccc2C#N)cc1	0	1.90164722	-2.39435278	0.80447	0.169	1.779	0.7763	0.43312674	-0.369184932	-0.456414683	4.296	1.146516615
309	42333-76-6	c1cncc(-c2nc(-c3cccnc3)nc(-c3cccnc3)n2)c1	0.16817912	1.866244704	-2.038855296	0.52293	-0.609	2.455	0.0088	0.802585786	-0.314448341	-1.004497799	3.9051	0.341040583
310	42333-78-8	c1cc(-c2nc(-c3ccncc3)nc(-c3ccncc3)n2)ccn1	0	2.121191171	-1.802508829	0.48545	-1.995	3.141	0.0615	0.731754784	-0.311490744	-0.917728922	3.9237	0.146945102
311	42906-19-4	Cc1ccc(N(c2ccc(C)cc2)c2ccc(C=O)cc2)cc1	0.067133349	0.366367842	-2.784732158	0.61644	-0.102	2.445	6.0834	0.346764613	-0.254527044	-0.553099235	3.1511	0.263331124
312	4316-53-4	Cc1ccc(N(c2ccccc2)c2ccccc2)cc1	0	0.00934652	-3.85995348	0.66337	0.566	2.103	0.0786	0.459694614	-0.14003188	-0.397569322	3.8693	0.583457511
313	432025-97-3	C#Cc1cc(C(=O)O)cc(C(=O)O)c1	0	1.781073812	-2.454426188	0.71385	-0.009	1.748	3.0584	0.640644604	-0.326426646	0.120665199	4.2355	1.066269784
314	4341-02-0	N#Cc1ccccc1-c1ccccc1C#N	0	1.909817543	-2.504082457	0.76824	0.139	0.934	0.6099	0.56987716	-0.35547996	-0.290423509	4.4139	1.099898515
315	434-90-2	Fc1c(F)c(F)c(-c2c(F)c(F)c(F)c(F)c2F)c(F)c1F	0	1.892899126	-2.938500874	0.86006	-0.125	2.42	0.004	0.732006612	-0.100052957	-0.352724497	4.8314	1.294762906
316	4411-83-0	N#Cc1cccc(-c2cccc(C#N)n2)n1	0.030097714	2.133021827	-2.294878173	0.74092	-0.315	2.327	0	0.437576088	-0.376414566	-0.343992251	4.4279	1.347808315
317	443956-21-6	COC(=O)c1nc(N)c(Br)cc1Br	0	1.178220983	-2.638779017	0.64351	-0.294	1.76	1.9338	0.543051905	-0.295796083	-0.497886306	3.817	1.084843237
318	443998-73-0	N#Cc1cccc(-c2ccc(N)cc2)c1	0	0.587438039	-2.986461961	0.42563	-0.292	2.048	8.8622	0.415476338	-0.351173555	-0.447770416	3.5739	0.546649166
319	444796-09-2	Brc1ccc2c3ccc(Br)cc3n(-c3ccccc3)c2c1	0.057188131	0.831896852	-3.078403147	0.7228	0.117	1.565	1.746	0.440185228	-0.181461819	-0.693414908	3.9103	0.824518445
320	4499-83-6	c1ccc(-c2ccc(-c3ccc(-c4ccc(-c5ccc(-c6ccccc6)cc5)cc4)cc3)cc2)cc1	0	0.793037265	-2.793062735	0.83553	-0.055	5.48	0	0.264424666	-0.291910581	-1.113305318	3.5861	0.652839904
321	453565-55-4	N#Cc1cc(F)cc(C#N)c1	0	2.445804005	-2.212895995	0.87465	0.232	1.359	0.352	0.733597114	-0.303090289	-0.211884669	4.6587	1.283427087
322	4591-56-4	CCOC(=O)c1cncc(C(=O)OCC)c1	0.006067272	1.75473066	-2.49156934	0.42225	0.172	1.421	1.8708	1.276116898	-0.247816547	-0.633443209	4.2463	0.218118298
323	4592-94-3	N#CCC(=O)c1ccc(Br)cc1	0	1.630849754	-2.233750246	0.50136	0.598	1.305	2.3625	0.978020364	-0.294828177	-0.392667888	3.8646	0.532338199
324	4612-28-6	OB(O)c1cccc(B(O)O)c1	0	1.620796689	-3.432903311	0.92397	0.341	1.242	0.3427	0.921700116	-0.421930799	-0.626530711	5.0537	1.367431037
325	4714-62-9	CNc1ccc(C#N)cc1	0	0.863658302	-3.590941697	0.74405	-0.05	2.09	2.8343	0.243827142	-0.32907855	-0.309977784	4.4546	1.388648776
326	4733-50-0	N#Cc1c(O)ccc(O)c1C#N	0	1.511699613	-2.158400387	0.77797	0.078	1.48	0.9952	0.524137671	-0.339728944	-0.305544506	3.6701	1.200211884
327	479-33-4	O=C1C(c2ccccc2)=C(c2ccccc2)C(c2ccccc2)=C1c1ccccc1	0.099602278	0.46801253	-1.47308747	0.69234	-0.726	1.721	0.4975	0.604028944	-0.276194695	-0.66062691	1.9411	0.778387128
328	479719-88-5	CC1(C)OB(c2ccc(-c3cccs3)s2)OC1(C)C	0	0.906579438	-2.668620562	0.83743	0.05	2.52	1.0978	0.246976478	-0.204982995	-0.593325482	3.5752	1.388302294
329	4805-22-5	Brc1ccc(-c2ccc(Br)s2)s1	0	0.861947478	-2.605452522	0.83122	-0.37	2.643	0.0041	0.252251375	-0.109258812	-0.592618565	3.4674	1.370412497
330	481-39-0	O=C1C=CC(=O)c2c(O)cccc21	0	1.367826871	-1.316273129	0.54711	0.214	1.62	2.3001	0.800686454	-0.380893247	-0.752333395	2.6841	0.449025498
331	485-47-2	O=C1c2ccccc2C(=O)C1(O)O	0	1.325036025	-1.981763975	0.52854	0.048	1.244	2.1677	1.325440688	-0.400817306	-0.533957926	3.3068	0.237917158
332	4854-84-6	N#Cc1ccc(-c2ccc(N)cc2)cc1	0	0.678643629	-2.827156371	0.56914	0.115	2.691	7.758	0.32348524	-0.362762439	-0.450738672	3.5058	0.880606431
333	486-25-9	O=C1c2ccccc2-c2ccccc21	2.555659982	1.078326873	-1.973473127	0.61672	-0.175	1.19	2.0632	0.687748168	-0.195224451	-0.549484079	3.0518	0.566426448
334	486-52-2	c1ccc2c(c1)Cc1cc3c(cc1-2)Cc1ccccc1-3	0.136376383	0.656248313	-3.111951687	0.80657	0.142	3.371	0.0024	0.29687159	-0.170879127	-0.678350088	3.7682	1.001242396
335	487-70-7	O=Cc1c(O)cc(O)cc1O	0	1.082292294	-2.826407706	0.55414	0.237	1.484	2.6966	0.731187744	-0.39022909	-0.373571527	3.9087	0.78093484
336	4877-80-9	Oc1cc2c3cc(O)c(O)cc3c3cc(O)c(O)cc3c2cc1O	0.154989083	0.148681676	-3.608818324	0.94948	-0.262	2.245	0.0035	0.614720798	-0.593795193	-0.772429658	3.7575	0.683575067
337	488-48-2	O=C1C(Br)=C(Br)C(=O)C(Br)=C1Br	0	2.156698326	-0.318701674	0.58788	-0.613	1.681	0.0009	0.631463783	-0.225965356	-0.42268813	2.4754	0.636366183
338	492-22-8	O=c1c2ccccc2sc2ccccc12	14.58847887	1.122144264	-2.336655736	0.69095	-0.028	1.452	2.2768	0.373503816	-0.196325012	-0.613837527	3.4588	0.725660282
339	493-77-6	c1ccc(-c2nc(-c3ccccc3)nc(-c3ccccc3)n2)cc1	0.078919519	1.732860849	-2.332239151	0.82618	-0.746	2.408	0.0035	0.526515687	-0.188236834	-0.968835274	4.0651	0.908167314
340	494-19-9	c1ccc2c(c1)CCc1ccccc1N2	0	-0.096473911	-4.319273911	0.7359	0.442	1.037	0.5629	0.604683018	-0.172944927	-0.39614652	4.2228	0.991697787
341	49669-22-9	Brc1cccc(-c2cccc(Br)n2)n1	0	1.768641012	-2.405258988	0.70176	-0.518	2.322	0.0004	0.377329247	-0.182948645	-0.610270549	4.1739	1.234715731
342	49764-63-8	Nc1cc(Br)c(Br)cc1N	0	0.239509442	-3.777290558	0.47468	-0.167	1.706	4.6917	0.73542361	-0.291284994	-0.44463121	4.0168	0.191292174
343	501-65-5	C(#Cc1ccccc1)c1ccccc1	0	1.000964388	-2.903935612	0.84518	0.293	1.428	0	0.365387132	-0.142590695	-0.442607148	3.9049	1.127965257
344	50-32-8	c1ccc2c(c1)cc1ccc3cccc4ccc2c1c34	0.008513104	0.574492001	-2.428707999	0.89533	0.02	2.705	0.1636	0.10994992	-0.164712448	-0.772392664	3.0032	1.198380291
345	503536-78-5	N#Cc1ccc(-c2ccc(N)nc2)cc1	0.082597382	0.92436463	-2.75803537	0.60225	0.076	2.736	7.0897	0.361011613	-0.378090619	-0.445346174	3.6824	0.961646852
346	504-24-5	Nc1ccncc1	0	0.85515508	-4.27934492	0.76099	-0.166	1.376	1.8258	0.846053147	-0.274840851	-0.294663873	5.1345	0.865106303
347	50446-44-1	O=C(O)c1ccc(-c2cc(-c3ccc(C(=O)O)cc3)cc(-c3ccc(C(=O)O)cc3)c2)cc1	0.002123533	1.484577101	-2.509922899	0.85873	1.174	1.055	0.038	0.409539788	-0.549447304	-0.337871834	3.9945	0.964911882
348	50670-64-9	Cc1ccc(N)cc1C#N	0	0.788599243	-3.153500757	0.69481	0.056	1.72	2.7266	0.533876832	-0.309974449	-0.330099042	3.9421	1.160548176
349	50777-76-9	O=Cc1ccccc1P(c1ccccc1)c1ccccc1	0.079012219	0.846400168	-2.469399832	0.48682	-0.559	1.699	3.6006	0.689426077	-0.244571355	-0.412496443	3.3158	0.135710916
350	50844-89-8	N#Cc1cc(C#N)ncn1	0	2.39994607	-1.40075393	0.52068	0.512	0.949	1.811	1.45851568	-0.321335085	-0.181184933	3.8007	0.494583364
351	517-51-1	c1ccc(-c2c3ccccc3c(-c3ccccc3)c3c(-c4ccccc4)c4ccccc4c(-c4ccccc4)c23)cc1	0.053949083	0.161715507	-1.937284493	0.89537	0.026	2.779	0.0001	0.094199215	-0.26266823	-0.603450997	2.099	1.051167349
352	517-60-2	O=C(O)c1c(C(=O)O)c(C(=O)O)c(C(=O)O)c(C(=O)O)c1C(=O)O	0	2.492045226	-1.933454774	0.79408	-0.348	1.648	0.5172	0.769983169	-0.838866691	0.571106169	4.4255	0.8971552
353	519-73-3	c1ccc(C(c2ccccc2)c2ccccc2)cc1	0	1.180187895	-3.999712105	0.92494	0.13	1.83	0.0246	0.621236339	-0.16392098	-0.344768562	5.1799	1.303274302
354	51980-54-2	O=Cc1ccc(N2CCCC2)cc1	0.173493417	0.69047618	-3.10642382	0.65398	0.031	2.195	4.5065	0.179539406	-0.266973765	-0.40248535	3.7969	1.078287899
355	52197-12-3	Cc1cnc(C#N)c(C#N)n1	0	2.173896782	-1.787903218	0.52409	0.166	1.352	1.3747	1.323514201	-0.347028212	-0.40543577	3.9618	0.378508993
356	523-27-3	Brc1c2ccccc2c(Br)c2ccccc12	0.012515013	0.869834245	-2.073365755	0.88337	-0.034	1.597	0.0008	0.179510284	-0.102024688	-0.719802433	2.9432	1.27786605
357	527-21-9	O=C1C(F)=C(F)C(=O)C(F)=C1F	0	2.280555565	-0.593844435	0.57792	0.182	0.686	0.0005	1.124753984	-0.229734557	-0.372793869	2.8744	0.822293622
358	530-62-1	O=C(n1ccnc1)n1ccnc1	0	1.707133729	-2.687866271	0.59678	-0.643	1.181	1.1781	0.752925572	-0.309335555	-0.382011795	4.395	0.42969704
359	53312-78-0	N#Cc1cc(N)cc(Cl)c1	0.000714916	1.10590736	-2.91779264	0.68359	0.14	1.473	2.7964	0.543852027	-0.323430872	-0.395266438	4.0237	1.131897289
360	53566-95-7	O=Cc1ccc(N(c2ccccc2)c2ccc(C=O)cc2)cc1	1.166210684	0.675848589	-2.359951411	0.58888	1.036	1.591	3.0572	0.306845616	-0.353160687	-0.491129458	3.0358	0.445083424
361	5372-81-6	COC(=O)c1ccc(C(=O)OC)c(N)c1	0.011160964	0.819998216	-2.524201784	0.66301	0.564	1.569	1.6408	0.5390502	-0.266836729	-0.592199214	3.3442	0.987833701
362	54117-37-2	O=Cc1ccc2c(c1)c1ccccc1n2Cc1ccccc1	2.5239633	0.897936652	-2.893763348	0.62279	-0.232	1.832	6.2079	0.345725348	-0.308775465	-0.65611102	3.7917	0.65237391
363	54286-63-4	Brc1ccc(Br)c2nonc12	0	1.738992394	-1.517607606	0.71537	-0.506	1.33	2.3882	0.493167481	-0.17596432	-0.369200335	3.2566	1.243111233
364	5431-44-7	O=Cc1cccc(C=O)n1	0	1.581044324	-2.003155676	0.52343	-0.533	0.955	0.8277	1.412826233	-0.22947907	-0.177659494	3.5842	0.520577829
365	5453-67-8	COC(=O)c1cccc(C(=O)OC)n1	0.02657184	1.741414757	-2.561785243	0.57539	0.058	1.15	0.9938	1.229201105	-0.332241075	-0.664267685	4.3032	0.469425837
366	54827-17-7	Cc1cc(-c2cc(C)c(N)c(C)c2)cc(C)c1N	0	0.09337605	-4.13742395	0.82432	-0.508	0.792	0.0673	0.252860242	-0.326813999	-0.463777179	4.2308	1.222593314
367	55211-74-0	N#CCc1ccc(C=O)cc1	4.216190462	1.246915858	-2.548484142	0.48657	0.733	1.4	2.4499	1.496020852	-0.325754554	-0.43872221	3.7954	0.503574604
368	5521-31-3	Cn1c(=O)c2ccc3c4ccc5c(=O)n(C)c(=O)c6ccc(c7ccc(c1=O)c2c37)c4c56	0	1.194849788	-0.975650212	0.8727	0.246	2.424	0.0001	0.091943266	-0.442412472	-1.312044506	2.1705	0.941635336
369	553-26-4	c1cc(-c2ccncc2)ccn1	0	1.813403823	-2.712896177	0.55668	-0.906	2.968	0.0016	0.943389371	-0.223170103	-0.332444	4.5263	0.822654661
370	5552-44-3	CCOC(=O)c1ccc(C(=O)OCC)nc1	0.02370513	1.751617129	-2.151782871	0.51012	0.32	1.667	1.9114	1.231404147	-0.283455622	-0.490519465	3.9034	0.236234193
371	55758-02-6	N#Cc1ncccc1Br	0	2.192754238	-2.385545762	0.46685	0.344	1.301	1.4736	0.728760928	-0.259157156	-0.32985762	4.5783	0.752105638
372	55981-29-8	Brc1nnc(Br)s1	0	2.370296468	-2.676003532	0.52625	0.088	1.085	1.9261	0.647943169	-0.165455861	-0.3830242	5.0463	1.059385706
373	55984-93-5	Cc1cc(C#N)ccc1C#N	0	2.405165119	-2.143534881	0.81307	0.559	1.36	0.4094	0.513129264	-0.303727741	-0.291272835	4.5487	1.523150667
374	56139-74-3	Cc1[nH]c(C)c(C=O)c1C=O	0	0.852917513	-2.840982487	0.51227	0.046	1.508	1.7575	0.855501845	-0.43188608	-0.461387974	3.6939	1.286087971
375	56432-18-9	O=Cc1ccc(-c2cccc3ccccc23)cc1	5.348914436	1.007685474	-2.424914526	0.52629	0.305	2.376	8.2345	0.355346704	-0.220815291	-0.565884136	3.4326	0.851211261
376	56432-20-3	O=Cc1cccc(-c2c(O)ccc3ccccc23)c1	0.012215834	0.68694556	-2.59565444	0.33941	-0.224	1.763	8.2821	0.463458608	-0.331178501	-0.554204351	3.2826	0.491167013
377	564483-19-8	CC(C)c1cc(C(C)C)c(-c2ccccc2P(C(C)(C)C)C(C)(C)C)c(C(C)C)c1	0	0.383372099	-3.772627901	0.46073	0.111	1.286	4.6614	0.778771432	-0.13970744	-0.516892993	4.156	0.394117313
378	56908-88-4	BrCc1cc(Br)cc(Br)c1	0	1.785951407	-2.864848593	0.75365	-0.087	1.695	2.406	0.61838688	-0.152881791	-0.472729995	4.6508	0.909427225
379	5695-13-6	O=c1c2ccccc2c2cc3c(=O)c4ccccc4c3cc12	0	1.006976598	-1.351023402	0.64663	-0.227	2.681	0.0002	0.508252543	-0.283364056	-0.80755738	2.358	0.499786736
380	56962-12-0	O=Cc1ccc(Cl)c(O)c1	0	1.320188508	-2.450711492	0.48095	0.749	1.362	2.4959	0.835664242	-0.278518105	-0.331583414	3.7709	0.641554235
381	56990-02-4	O=Cc1cc(Br)cc(Br)c1	0.234026148	1.520140811	-2.204659189	0.46986	0.624	1.314	2.4351	1.004172914	-0.15923182	-0.41331933	3.7248	0.51019582
382	57121-48-9	C#Cc1cnc[nH]1	0	1.167997594	-4.031002406	0.84323	0.038	1.231	0.368	0.531377898	-0.282108853	-0.36231308	5.199	0.439210682
383	57341-98-7	O=Cc1ccc(C#Cc2ccccc2)cc1	1.658976208	1.260159185	-2.116940815	0.73727	0.405	3.358	5.2091	0.302538083	-0.221906219	-0.559430218	3.3771	0.976207401
384	57381-41-6	N#Cc1cc(Br)ccc1Br	0	1.894162681	-2.483037319	0.69697	-0.46	1.475	1.4059	0.581757924	-0.20544205	-0.373834036	4.3772	1.112688289
385	580-35-8	c1ccc(-c2cc(-c3ccccc3)nc(-c3ccccc3)c2)cc1	0	1.159359544	-2.841640456	0.7472	-0.124	2.045	2.0947	0.435001228	-0.220919021	-0.833537722	4.001	0.868153315
386	5824-40-8	NC(c1ccccc1)(c1ccccc1)c1ccccc1	0	1.34825255	-3.86424745	0.72475	0.65	1.377	1.6339	0.622117966	-0.223902713	-0.401025868	5.2125	0.94797048
387	58633-04-8	N#Cc1cc(Br)c(N)c(Br)c1	0	1.370562337	-3.093437663	0.81564	-0.435	1.643	1.1765	0.320278793	-0.263777907	-0.345559962	4.464	1.16870928
388	5918-93-4	O=c1[nH]cc[nH]1	0	0.518775947	-5.667324053	0.77595	-0.302	1.146	2.3255	0.601017957	-0.356988337	-0.53991159	6.1861	2.479753252
389	595-91-5	O=C(O)C(c1ccccc1)(c1ccccc1)c1ccccc1	0	1.433961876	-3.602838124	0.723	-0.117	1.569	1.0169	0.595059359	-0.272161218	-0.284415013	5.0368	0.537632239
390	602-09-5	Oc1ccc2ccccc2c1-c1c(O)ccc2ccccc12	0	0.692143325	-3.214056675	0.825	0.354	1.473	0.535	0.360881941	-0.42032925	-0.447214178	3.9062	0.998079218
391	603-34-9	c1ccc(N(c2ccccc2)c2ccccc2)cc1	0	0.062115814	-3.850084186	0.6522	0.61	2.092	0.0081	0.468921424	-0.140047336	-0.373189803	3.9122	0.662872901
392	60532-63-0	Nc1ccc(C(c2ccc(N)cc2)(c2ccc(N)cc2)c2ccc(N)cc2)cc1	0	0.360570321	-3.915729679	0.70898	-0.479	2.227	1.7701	0.336100521	-0.641100677	-0.426250479	4.2763	1.040640113
393	60710-80-7	Cc1ccc(C#N)cc1N	0	0.884490974	-3.245909026	0.70146	0.227	1.599	2.8577	0.528605369	-0.317197798	-0.342210957	4.1304	1.188863738
394	607-99-8	COc1c(Br)cc(Br)cc1Br	0	1.437655953	-3.306544047	0.56328	0.579	2.13	0.1405	0.842408055	-0.117243968	-0.557051677	4.7442	0.25401803
395	608-25-3	Cc1c(O)cccc1O	0	0.551056271	-4.509543729	0.88584	-0.015	1.255	0.0972	0.850343894	-0.268546633	-0.336247045	5.0606	1.404207735
396	60992-98-5	O=Cc1ccc(-c2ccc(F)cc2)cc1	5.252466073	1.328638329	-2.422361671	0.47967	1.038	1.6	2.9568	0.519695547	-0.211925741	-0.457815356	3.751	0.834022345
397	610-71-9	O=C(O)c1cc(Br)ccc1Br	0	1.720998959	-2.539701041	0.65569	-0.458	1.486	1.8647	0.608283488	-0.214600285	-0.120133813	4.2607	0.953548987
398	612-71-5	c1ccc(-c2cc(-c3ccccc3)cc(-c3ccccc3)c2)cc1	0.045745231	1.0380373	-3.2860627	0.9233	0.021	2.18	0.0068	0.543357451	-0.195652404	-0.741023665	4.3241	1.035647466
399	613-33-2	Cc1ccc(-c2ccc(C)cc2)cc1	0	1.044596714	-3.602303286	0.85661	-0.003	0.792	0.0141	0.327396607	-0.116933895	-0.420630526	4.6469	1.3316743
400	613-73-0	N#CCc1ccccc1CC#N	0	1.683289406	-3.672810594	0.96398	0.273	1.349	0.3627	0.988904157	-0.367110859	-0.28201569	5.3561	1.499320371
401	614-16-4	N#CCC(=O)c1ccccc1	0	1.485552538	-2.422047462	0.50354	0.491	1.212	2.1439	1.310925753	-0.292146639	-0.294569429	3.9076	0.510660399
402	615-57-6	Nc1ccc(Br)cc1Br	0	0.573946713	-3.786753287	0.50451	0.369	1.238	2.634	0.746540461	-0.181370117	-0.421293776	4.3607	0.260034448
403	615-94-1	O=C1C=C(O)C(=O)C=C1O	0	1.611631595	-1.177968405	0.6634	0.137	0.873	0	0.890241161	-0.199411454	-0.265397257	2.7896	0.854926229
404	6163-58-2	Cc1ccccc1P(c1ccccc1C)c1ccccc1C	0	0.695641508	-3.673258492	0.66033	0.509	1.742	2.6111	0.553500631	-0.142996198	-0.42142256	4.3689	0.338263398
405	619-21-6	O=Cc1cccc(C(=O)O)c1	1.061805781	1.435913369	-2.326686631	0.47157	0.703	1.296	2.5097	1.559029668	-0.268984707	-0.160661313	3.7626	0.504884447
406	619-66-9	O=Cc1ccc(C(=O)O)cc1	2.337106973	1.538196632	-2.029303368	0.4734	1.042	1.569	3.3156	1.485948319	-0.267312029	-0.171508239	3.5675	0.474186155
407	620932-49-2	CCN1C(=O)C(=O)c2cc(Br)cc(Br)c21	0.104973573	1.189937273	-1.376362727	0.55799	-0.473	1.461	3.1725	0.715684281	-0.260162341	-0.577919101	2.5663	0.454966133
408	62150-45-2	N#Cc1cc(Br)ccn1	0	2.257689595	-2.404510405	0.47044	0.639	1.156	2.0217	0.973890988	-0.236389189	-0.294882358	4.6622	0.685818095
409	621-59-0	COc1ccc(C=O)cc1O	0	1.06666223	-2.85283777	0.45684	0.76	1.384	2.4712	0.519276046	-0.336466282	-0.43118168	3.9195	0.896431053
410	622-75-3	N#CCc1ccc(CC#N)cc1	0	1.511116172	-3.828383828	0.96427	0.153	1.32	0	1.11704635	-0.422469664	-0.363642551	5.3395	1.55993297
411	623-00-7	N#Cc1ccc(Br)cc1	0	2.18127186	-2.76392814	0.76363	-0.344	2.245	3.0369	0.389113861	-0.204337543	-0.30843814	4.9452	1.688456267
412	623-24-5	BrCc1ccc(CBr)cc1	0	1.961925112	-2.760374888	0.75464	0.327	1.202	0.1181	0.350977493	-0.227524836	-0.451958196	4.7223	1.221760703
413	623-26-7	N#Cc1ccc(C#N)cc1	0	2.643615883	-2.112184117	0.85105	0.654	0.759	0.0001	0.446166561	-0.315661284	-0.239952798	4.7558	1.670198111
414	623-27-8	O=Cc1ccc(C=O)cc1	0.014473879	1.629904764	-1.824695236	0.50833	-0.67	3.019	0.0011	1.327936426	-0.240847842	-0.365611791	3.4546	0.49272505
415	624-28-2	Brc1ccc(Br)nc1	0	1.790779893	-3.075320107	0.71964	-0.845	1.032	0.2378	0.688731788	-0.13781816	-0.345881824	4.8661	1.226666628
416	625-92-3	Brc1cncc(Br)c1	0	1.846083381	-3.069616619	0.76131	-0.653	1.212	0.6719	0.714989001	-0.103033683	-0.319159361	4.9157	1.220373743
417	626-05-1	Brc1cccc(Br)n1	0	1.846540871	-3.091459129	0.73538	-0.644	1.245	1.126	0.708271552	-0.165217762	-0.374855989	4.938	1.226098456
418	626-15-3	BrCc1cccc(CBr)c1	0	1.833006849	-2.967293151	0.88569	0.451	1.275	0.5595	0.557117344	-0.214962195	-0.437017352	4.8003	0.011467114
419	626-17-5	N#Cc1cccc(C#N)c1	0	2.4255657	-2.4172343	0.94043	0.14	1.271	0.0304	0.71864163	-0.324523733	-0.251892399	4.8428	1.415710849
420	626-19-7	O=Cc1cccc(C=O)c1	1.650051944	1.503571082	-2.221628918	0.49219	-0.439	1.139	1.4548	1.326012721	-0.247367534	-0.370523462	3.7252	0.504339023
421	626-22-2	N#CCc1cccc(CC#N)c1	0	1.659021746	-3.682578254	0.96669	0.18	1.214	0.0868	0.993375541	-0.416392129	-0.415011653	5.3416	1.525695495
422	630-76-2	c1ccc(C(c2ccccc2)(c2ccccc2)c2ccccc2)cc1	0	1.34861021	-3.75018979	0.85465	0.42	1.698	1.34	0.397365857	-0.176559159	-0.359739854	5.0988	1.384664307
423	632-51-9	c1ccc(C(=C(c2ccccc2)c2ccccc2)c2ccccc2)cc1	0	0.56539671	-2.95410329	0.85331	-0.055	1.956	0.0001	0.394666183	-0.1954204	-0.399253635	3.5195	1.324857788
424	633-70-5	O=C1c2ccc(Br)cc2C(=O)c2ccc(Br)cc21	0	1.794125668	-1.218674332	0.5589	0.019	1.877	0.0013	0.737879059	-0.19973067	-0.638504409	3.0128	0.411008183
425	635-10-9	COC(=O)c1cc(C(=O)OC)c(C(=O)OC)cc1C(=O)OC	0	2.274712406	-2.077987594	0.61709	-0.648	2.089	1.2679	0.674523456	-0.450266197	-0.550632503	4.3527	0.188091581
426	635-12-1	O=C1C=CC(=O)c2cc3ccccc3cc21	0	1.446541954	-1.313958046	0.55295	0.083	1.836	6.0143	0.38929682	-0.248069177	-0.545065631	2.7605	0.557996088
427	636-09-9	CCOC(=O)c1ccc(C(=O)OCC)cc1	0	2.164335734	-2.390964266	0.75927	0.736	1.161	0.142	0.748909483	-0.219286778	-0.559187256	4.5553	0.87414723
428	636-28-2	Brc1cc(Br)c(Br)cc1Br	0	1.468854739	-3.038645261	0.63153	0.356	2.384	0.0084	0.797122523	-0.086912892	-0.457987008	4.5075	0.775769673
429	63697-96-1	C#Cc1ccc(C=O)cc1	0	1.418018619	-2.248381381	0.46615	1.085	1.597	3.1664	0.866110702	-0.193624835	-0.311646883	3.6664	0.697199629
430	6374-91-0	O=C1Nc2c(Br)cc(Br)cc2C1=O	0.874342748	1.347222716	-1.376277284	0.55733	-0.39	1.509	3.5295	0.707354855	-0.298933546	-0.379082565	2.7235	0.836736863
431	642-31-9	O=Cc1c2ccccc2cc2ccccc12	2.059389223	0.953007282	-1.852292718	0.82845	-0.19	1.699	0.5149	0.179395196	-0.205473234	-0.699603858	2.8053	1.22297596
432	6424-77-7	COc1ccc(-n2c(=O)c3ccc4c5ccc6c(=O)n(-c7ccc(OC)cc7)c(=O)c7ccc(c8ccc(c2=O)c3c48)c5c67)cc1	0	1.206406846	-0.963393154	0.87313	0.233	2.866	0.001	0.089634784	-0.745998878	-1.602576904	2.1698	0.93847692
433	64248-63-1	N#Cc1cc(F)cc(F)c1	0	2.119254106	-2.714845894	0.82137	0.299	1.429	1.3545	0.761578942	-0.180438266	-0.214544149	4.8341	1.422092715
434	64695-78-9	Fc1cc(Br)c(Br)cc1F	0	1.307734021	-3.468665979	0.58794	-0.064	1.665	2.0961	0.994679172	-0.083399913	-0.385270084	4.7764	0.395371753
435	652-36-8	O=C(O)c1c(F)c(F)c(C(=O)O)c(F)c1F	0	2.040037869	-2.121162131	0.67942	0.558	1.306	0.1134	0.727159567	-0.363203643	-0.428265234	4.1612	1.056655052
436	65283-60-5	Oc1ccc2cc(Br)ccc2c1-c1c(O)ccc2cc(Br)ccc12	0	0.822992067	-2.812707933	0.65253	-0.039	2.084	4.7874	0.355471985	-0.358424795	-0.594392928	3.6357	0.841447683
437	66-39-7	O=Cc1ccc(S(=O)(=O)c2ccccc2)cc1	0.04245143	1.590365681	-2.019434319	0.47786	0.968	1.333	2.9835	1.212771351	-0.401972126	-0.448390661	3.6098	0.490571303
438	66-98-8	O=Cc1ccc(-c2ccc(C=O)cc2)cc1	8.888616455	1.646838462	-2.021761538	0.48913	-1.059	0.603	0.2093	0.475538321	-0.302533084	-0.61939528	3.6686	0.879878556
439	66-99-9	O=Cc1ccc2ccccc2c1	9.928568659	1.273023095	-2.345476905	0.71177	0.295	2.013	3.6577	0.386571299	-0.190768519	-0.433002949	3.6185	1.034029427
440	67000-89-8	OCCCCc1ccc2ccc3cccc4ccc1c2c34	0.855146474	0.736517216	-2.703682784	0.91054	0.033	2.075	0.1137	0.100673025	-0.260261173	-0.689986171	3.4402	1.381071545
441	67019-91-4	Brc1ccc2c(c1)oc1cc(Br)ccc12	0	1.310797355	-2.911902645	0.77421	-0.485	1.045	0.4804	0.346879459	-0.130830842	-0.576719244	4.2227	1.151449697
442	6825-20-3	Brc1ccc2[nH]c3ccc(Br)cc3c2c1	0	0.760885195	-3.111214805	0.75072	-0.157	1.382	0.1134	0.435489607	-0.254062656	-0.559934213	3.8721	0.720226784
443	688756-58-3	CC1(C)OB(c2cc3ccc4cc(B5OC(C)(C)C(C)(C)O5)cc5ccc(c2)c3c45)OC1(C)C	0.084678399	0.693574535	-2.704625465	0.82945	0.448	2.672	0.0003	0.232252189	-0.290689882	-0.92552606	3.3982	1.204216761
444	69272-50-0	Nc1c(Br)ccc(Br)c1N	0	0.458167636	-4.091532364	0.38098	0.913	1.311	2.2207	0.699328749	-0.186275498	-0.50829306	4.5497	0.193145535
445	6968-35-0	O=C1CCc2cccc(O)c21	2.684556923	0.812301901	-3.022198099	0.47824	0.63	1.286	2.4354	1.068348223	-0.357549026	-0.527745485	3.8345	0.414881766
446	699-83-2	CC(=O)c1c(O)cccc1O	0	0.95024001	-2.68105999	0.57485	0.191	1.379	2.9733	0.632239437	-0.240965858	-0.606982222	3.6313	0.278491682
447	70416-53-4	N#Cc1cncc(C=O)c1	0.088923554	1.576977019	-2.018222981	0.48826	0.182	1.404	1.9022	1.522919892	-0.303828478	-0.290771013	3.5952	0.491193516
448	7044-91-9	O=Cc1c2ccccc2c(C=O)c2ccccc12	2.965671268	1.105367013	-1.306932987	0.7714	-0.159	0.745	0.1745	0.241644021	-0.233170664	-0.683008671	2.4123	1.143473983
449	71071-46-0	COC(=O)c1ccnc(-c2cc(C(=O)OC)ccn2)c1	0	1.819541877	-2.252458123	0.54065	0.638	1.725	0.0013	0.458731519	-0.28666427	-0.599458237	4.072	0.981475128
450	712-74-3	N#Cc1cc(C#N)c(C#N)cc1C#N	0	3.271600238	-0.941699762	0.88944	0.162	0.837	0	0.399300633	-0.51937645	-0.317666594	4.2133	1.413936482
451	71605-72-6	O=Cc1ccc2nsnc2c1	0	1.917190472	-1.557909528	0.42788	1.354	1.788	5.041	0.538559104	-0.206092699	-0.490639598	3.4751	1.068513437
452	716-79-0	c1ccc(-c2nc3ccccc3[nH]2)cc1	0	1.021097072	-3.010602928	0.77281	0.079	2.823	2.4673	0.341724082	-0.282762823	-0.595350392	4.0317	1.099882351
453	72115-06-1	Cc1cc(N)ccc1C#N	0	1.117493186	-3.510806814	0.75798	0.008	2.134	2.5718	0.242228002	-0.345178198	-0.33846037	4.6283	1.518216633
454	7228-47-9	CC(O)c1ccc2ccccc2c1	0	1.049252474	-3.272447526	0.89762	0.005	1.724	0.2674	0.336522772	-0.186084393	-0.401272776	4.3217	1.583884656
455	7310-95-4	Cc1cc(C=O)c(O)c(C=O)c1	7.622055407	1.479470315	-2.100829685	0.66972	0.323	1.672	0.8525	0.571510003	-0.238029187	-0.401638064	3.5803	1.196882228
456	7311-34-4	COc1cc(C=O)cc(OC)c1	5.778804088	1.175504796	-2.631395204	0.57202	0.057	1.405	3.1048	0.581431602	-0.234528208	-0.491310222	3.8069	0.788974936
457	73318-02-2	N#CC(C#N)=c1cc(F)c(=C(C#N)C#N)cc1F	0	2.654473826	0.186573826	0.88163	-0.24	2.822	0.0003	-0.131264363	-0.488338806	-0.371343717	2.4679	1.573360686
458	74-31-7	c1ccc(Nc2ccc(Nc3ccccc3)cc2)cc1	0	-0.243648063	-3.979148063	0.70805	0.378	3.624	0.0046	0.431738892	-0.277178356	-0.612942914	3.7355	0.68440591
459	74553-29-0	O=Cc1cc(Br)ccc1Br	0.95703999	1.479432892	-2.161967108	0.489	0.452	1.406	2.1945	0.909238762	-0.148775062	-0.433806631	3.6414	0.489179717
460	74866-28-7	Brc1ccc2ccccc2c1-c1c(Br)ccc2ccccc12	0	1.16061044	-2.85688956	0.88801	0	1.529	0.115	0.372044056	-0.19917692	-0.547381246	4.0175	1.121554546
461	7511-49-1	Brc1ccc(-c2cc(-c3ccc(Br)cc3)cc(-c3ccc(Br)cc3)c2)cc1	0	1.180050489	-3.040749511	0.91069	-0.254	2.448	0.0071	0.473214829	-0.230161067	-0.860483857	4.2208	1.006521769
462	7567-63-7	C#Cc1cc(C#C)cc(C#C)c1	0	1.34425048	-2.93444952	0.92902	-0.25	1.779	0.0014	0.779049963	-0.169210313	-0.371824174	4.2787	1.137021994
463	7570-45-8	CCn1c2ccccc2c2cc(C=O)ccc21	2.451002401	0.850451941	-2.922548059	0.6256	-0.192	2.203	6.1549	0.341543366	-0.272933366	-0.566641173	3.773	0.669711155
464	76-54-0	O=C1OC2(c3cc(Cl)c(O)cc3Oc3cc(O)c(Cl)cc32)c2ccccc21	25.18569371	1.209558595	-2.875241405	0.25508	-0.925	1.283	6.701	0.487823315	-0.503457214	-0.690085069	4.0848	0.600612712
465	76-60-8	Cc1c(C2(c3cc(Br)c(O)c(Br)c3C)OS(=O)(=O)c3ccccc32)cc(Br)c(O)c1Br	0	1.558594105	-2.955405895	0.58413	0.245	1.772	6.0199	0.399947168	-0.483152958	-1.387495345	4.514	0.860230827
466	766-96-1	C#Cc1ccc(Br)cc1	0	1.609584257	-3.190415743	0.83081	-0.472	2.421	0.2793	0.358016747	-0.115475505	-0.347925556	4.8	1.757635283
467	767-00-0	N#Cc1ccc(O)cc1	0	1.70496924	-3.32913076	0.92423	-0.134	1.588	0.2969	0.381744304	-0.323939098	-0.269748383	5.0341	1.672723999
468	76-84-6	OC(c1ccccc1)(c1ccccc1)c1ccccc1	0	1.41098872	-3.84951128	0.9106	0.238	2.069	1.1487	0.607395481	-0.207017883	-0.355449576	5.2605	1.147495079
469	77-08-7	CC1(C)CC2(CC(C)(C)c3cc(O)c(O)cc32)c2cc(O)c(O)cc21	0	0.436073447	-4.263326553	0.80162	-0.277	2.143	0.428	0.498605113	-0.397684714	0.045390902	4.6994	1.033749668
470	771-63-1	Oc1c(F)c(F)c(O)c(F)c1F	0	0.461481895	-4.556418105	0.8817	-0.261	1.184	0.0085	1.319642083	-0.218094842	-0.3746943	5.0179	1.132513625
471	773-82-0	N#Cc1c(F)c(F)c(F)c(F)c1F	0.035312091	2.182315538	-2.532084462	0.80648	0.219	1.494	1.3338	0.880033018	-0.17986838	-0.247818595	4.7144	1.314117461
472	7797-81-1	O=C1c2cccc3cccc(c23)C(=O)N1O	0	1.847354669	-1.705345331	0.81615	0.117	1.846	0.7076	0.258191898	-0.339510138	-0.593693052	3.5527	0.920925278
473	779-90-8	CC(=O)c1cc(C(C)=O)cc(C(C)=O)c1	1.983906298	1.381060205	-2.347639795	0.50715	-0.715	2.167	0.0017	1.270863088	-0.316612809	-0.700863748	3.7287	0.466203557
474	781-43-1	Cc1c2ccccc2c(C)c2ccccc12	0.679741824	0.417919697	-2.585780303	0.89196	0.174	0.778	0.0106	0.19618036	-0.131388701	-0.525352841	3.0037	1.341285549
475	78473-10-6	N#Cc1cnc(N)c(C#N)c1	0.468408586	1.494939173	-2.525660827	0.63674	-0.329	1.335	1.1404	0.597315027	-0.3946103	-0.239805292	4.0206	1.02648572
476	785051-54-9	CC1(C)OB(c2ccc(-n3c4ccccc4c4ccccc43)cc2)OC1(C)C	0.134580522	0.504457925	-3.328842075	0.48392	-0.159	2.164	6.6872	0.467767603	-0.234895017	-0.70299885	3.8333	0.439854066
477	787-69-9	CC(=O)c1ccc(-c2ccc(C(C)=O)cc2)cc1	3.668331036	1.483658267	-2.232241733	0.49815	-1.045	0.984	0.7753	0.515853455	-0.31958831	-0.705610525	3.7159	0.815946804
478	787-70-2	O=C(O)c1ccc(-c2ccc(C(=O)O)cc2)cc1	0.070431782	1.757272292	-2.333027708	0.80528	0.722	0.765	0.025	0.348251907	-0.348898935	0.043069102	4.0903	1.140999986
479	78881-21-7	Cc1cc(C#N)ccc1N	0.013347655	1.115321617	-3.543178383	0.76335	-0.012	2.075	2.6431	0.240843952	-0.34861474	-0.238620421	4.6585	1.526883051
480	792-74-5	COC(=O)c1ccc(-c2ccc(C(=O)OC)cc2)cc1	0.00435176	1.685498228	-2.400501772	0.8072	0.693	0.768	0.033	0.35084652	-0.28670691	-0.680889913	4.086	1.126696666
481	793-06-6	CC(=O)c1ccc(CCc2ccc(C(C)=O)cc2)cc1	0.387195657	1.152613858	-2.715086142	0.4965	-0.952	5.635	0.3661	1.028124987	-0.35057575	-0.597953381	3.8677	0.466423642
482	79370-78-8	N#Cc1cc(O)cc(C#N)c1	2.142969112	1.918516096	-2.385083904	0.77616	0.27	1.459	1.2812	0.595515078	-0.416969063	-0.230584728	4.3036	1.187529132
483	80-08-0	Nc1ccc(S(=O)(=O)c2ccc(N)cc2)cc1	0.007965251	0.523294162	-3.824605838	0.71457	-0.672	1.246	1.3899	0.673306494	-0.639230989	-0.516768399	4.3479	0.759901403
484	81-30-1	O=c1oc(=O)c2ccc3c(=O)oc(=O)c4ccc1c2c43	0.094077048	2.546447929	-0.705452071	0.86303	0.296	1.363	0	0.257206335	-0.494442083	-0.558449624	3.2519	1.258814983
485	81-33-4	O=c1[nH]c(=O)c2ccc3c4ccc5c(=O)[nH]c(=O)c6ccc(c7ccc1c2c73)c4c65	0	1.239276809	-0.934623191	0.87231	0.245	1.964	0.0001	0.094057364	-0.525186253	-1.119276935	2.1739	0.938785224
486	81502-74-1	O=Cc1cc(C=O)c(O)c(C=O)c1	10.88695389	1.731959228	-1.864740772	0.46343	0.391	1.848	2.9937	0.806802283	-0.306062036	-0.404893396	3.5967	0.440072817
487	81-83-4	O=C1NC(=O)c2cccc3cccc1c23	24.54	1.727214068	-1.878285932	0.83765	0.197	1.764	1.036	0.264062209	-0.291937929	-0.507428886	3.6055	1.318398533
488	83-53-4	Brc1ccc(Br)c2ccccc12	0	1.292468445	-2.729231555	0.87114	-0.224	1.738	0.6036	0.298091426	-0.094635187	-0.572212654	4.0217	1.41944726
489	83834-10-0	Brc1ccc2c(c1)sc1cc(Br)ccc12	0	1.236769654	-2.899430346	0.77673	0.266	1.353	1.4793	0.436411886	-0.144740986	-0.634547644	4.1362	1.103728968
490	840-65-3	COC(=O)c1ccc2cc(C(=O)OC)ccc2c1	0.062289984	1.40634934	-2.24665066	0.7781	0.752	1.541	0.1392	0.40272878	-0.264416229	-0.731036442	3.653	1.170376571
491	84-15-1	c1ccc(-c2ccccc2-c2ccccc2)cc1	0	1.108535034	-3.437964966	0.83732	0.066	2.019	0.8069	0.408648614	-0.147128615	-0.372745304	4.5465	0.94081418
492	84405-44-7	O=C1C(=O)c2cc(Br)ccc2-c2ccc(Br)cc21	0	1.368964336	-1.011935664	0.55908	0.437	1.344	1.4458	0.609954392	-0.310139975	-0.751253765	2.3809	0.443668274
493	84-65-1	O=C1c2ccccc2C(=O)c2ccccc21	0	1.553278195	-1.465621805	0.56292	0.002	1.41	0.0008	1.186161238	-0.215594314	-0.647113025	3.0189	0.407240996
494	848501-90-6	N#Cc1csc(Br)n1	0	2.335875056	-2.599224944	0.83684	-0.356	1.565	1.4868	0.40202751	-0.246581726	-0.32564383	4.9351	0.344805539
495	850583-75-4	O=C1N=C(c2cccs2)c2c(O)[nH]c(-c3cccs3)c21	0	0.777368557	-1.697531443	0.70243	0.21	2.629	4.5606	0.182820324	-0.511334341	-0.886188989	2.4749	0.859586191
496	85553-53-3	O=Cc1cccc(-c2ccccn2)c1	2.432754201	1.267958643	-2.542541357	0.48809	0.649	1.201	2.3479	0.767180971	-0.22563893	-0.471991272	3.8105	0.562128151
497	858448-84-7	Cc1[nH]c(C=O)cc1C#N	0	1.223520788	-2.811879212	0.47316	0.653	1.255	2.2824	0.858065849	-0.361196946	-0.499867934	4.0354	0.818250458
498	859064-02-1	N#Cc1cncc(Br)n1	0.087350341	2.086541547	-1.871458453	0.55093	0.024	1.418	1.2605	1.109678768	-0.228233418	-0.230896841	3.958	0.548891922
499	859855-53-1	N#Cc1ccc(F)c(N)c1	0	1.013818533	-3.199981467	0.70203	0.158	1.576	2.9543	0.593760455	-0.296076196	-0.253552103	4.2138	1.219438463
500	862705-46-2	CC(Oc1ccc(Br)cc1Br)C(=O)NN	0	1.006558752	-3.684441248	0.72887	-0.032	1.633	0.9468	0.673117854	-0.381613992	-0.704825197	4.691	0.406542536
501	863992-56-7	CC1(C)OB(c2c3ccccc3c(B3OC(C)(C)C(C)(C)O3)c3ccccc23)OC1(C)C	0	0.558263032	-2.424436968	0.87775	-0.144	1.564	0.0018	0.241102712	-0.349974325	-0.783080136	2.9827	1.28725422
502	86-73-7	c1ccc2c(c1)Cc1ccccc1-2	0	1.034315131	-3.481484869	0.79954	0.136	1.006	0.3619	0.3483577	-0.121399759	-0.420505048	4.5158	1.376497951
503	86-74-8	c1ccc2c(c1)[nH]c1ccccc12	0	0.543492933	-3.527407067	0.77946	0.24	1.272	0.7654	0.49537364	-0.20851962	-0.455832372	4.0709	0.741616879
504	87199-17-5	O=Cc1ccc(B(O)O)cc1	0.040099698	1.328417531	-2.383782469	0.48239	0.815	1.454	2.7015	1.586358077	-0.382476971	-0.483802661	3.7122	0.493073083
505	87220-68-6	O=Cc1ccc2c(c1)c1ccccc1n2-c1ccccc1	2.506820259	0.877362544	-2.855437456	0.61741	-0.221	2.079	6.135	0.339529796	-0.268242682	-0.653680942	3.7328	0.635267255
506	873-74-5	N#Cc1ccc(N)cc1	0	1.167247995	-3.519352005	0.75766	-0.001	2.154	2.6511	0.250942821	-0.356661829	-0.29777675	4.6866	1.520700126
507	87486-34-8	Cn1cc(Br)nc(Br)c1=O	0	1.456489991	-2.262810009	0.72751	-0.63	1.609	0.729	0.430070319	-0.33093349	-0.629009843	3.7193	1.429123326
508	876-31-3	N#CCc1ccc(C#N)cc1	0	2.231707976	-2.800892024	0.90846	0.419	1.5	0.5544	0.645233558	-0.398114734	-0.343210405	5.0326	1.612091672
509	88-45-9	Nc1ccc(N)c(S(=O)(=O)O)c1	0	0.247360088	-3.349339912	0.69586	-0.252	1.601	0.938	0.562537817	-0.486715761	-0.556998938	3.5967	1.044578078
510	886363-61-7	Nc1c(Br)cc2[nH]cnc2c1Br	0	0.675458413	-3.448341587	0.76991	-0.014	1.632	2.3419	0.527723024	-0.39414534	-0.63521201	4.1238	0.175522409
511	886364-86-9	Cc1cc(C#N)ncc1Br	0	2.206754126	-2.473045874	0.47279	0.389	1.172	2.0587	0.574894958	-0.24184832	-0.354727244	4.6798	0.934856729
512	886-66-8	C(C#Cc1ccccc1)#Cc1ccccc1	0	0.916499291	-2.509000709	0.84439	0.273	1.992	0	0.415624904	-0.161304205	-0.49231465	3.4255	0.916535442
513	888041-37-0	Brc1ccc2c3ccc(Br)cc3c3ccccc3c2c1	0	0.968512163	-2.948987837	0.94071	-0.197	2.001	0.1285	0.56128814	-0.170039332	-0.825915167	3.9175	0.870723504
514	88946-67-2	COc1cc(C#N)c(C#N)cc1OC	0	1.628191675	-2.462508325	0.80106	-0.019	1.855	3.5059	0.27243168	-0.44833327	-0.459658959	4.0907	1.483360263
515	89-32-7	O=c1oc(=O)c2cc3c(=O)oc(=O)c3cc12	0	2.949001686	-0.861198314	0.51385	-0.781	2.478	0.0006	1.182186516	-0.436654207	-0.345153846	3.8102	0.591310746
516	898-22-6	CCOC(=O)c1nc(C(=O)OCC)nc(C(=O)OCC)n1	0.001078391	2.16214811	-1.54865189	0.52688	-0.409	1.468	0.0945	1.159292893	-0.569734145	-0.510461626	3.7108	0.23766812
517	9003-53-6	C=Cc1ccccc1	0	1.400523645	-3.406876355	0.83568	0.071	1.142	0.3191	0.264549092	-0.091468608	-0.274767793	4.8074	2.046861524
518	90271-86-6	N#Cc1c[nH]c2ccc(Br)cc12	0.014996589	1.33484777	-3.25435223	0.79687	-0.14	1.916	1.3988	0.375430936	-0.401861376	-0.421138455	4.5892	1.330362362
519	90-41-5	Nc1ccccc1-c1ccccc1	0	0.439257778	-3.705442222	0.62414	0.556	1.843	3.2821	0.578288605	-0.186550713	-0.341954844	4.1447	0.860813394
520	90-47-1	O=c1c2ccccc2oc2ccccc12	7.475810969	1.344586567	-2.424613433	0.46078	1.103	1.251	2.4723	0.502079202	-0.199147559	-0.555807717	3.7692	0.468925503
521	909280-97-3	Brc1cc2cc3sc(Br)cc3cc2s1	0	0.953981306	-2.849218694	0.85201	-0.052	2.721	0.003	0.262617479	-0.131965009	-0.656438258	3.8032	1.230306684
522	91-01-0	OC(c1ccccc1)c1ccccc1	0	1.457934219	-3.881465781	0.95194	-0.004	2.189	0.3417	0.51490945	-0.201784007	-0.397142641	5.3394	1.263823087
523	911818-75-2	O=C(O)c1ccc(-c2ccc(-c3cc(-c4ccc(-c5ccc(C(=O)O)cc5)cc4)cc(-c4ccc(-c5ccc(C(=O)O)cc5)cc4)c3)cc2)cc1	0	1.225912744	-2.527887256	0.76256	2.274	4.301	2.9848	0.228257288	-0.678487915	-0.868580929	3.7538	0.863133456
524	91-20-3	c1ccc2ccccc2c1	0	1.09678831	-3.26711169	0.91369	0.063	1.592	0	0.324577765	-0.101376161	-0.342580699	4.3639	1.753406728
525	917-23-7	C1=Cc2nc1c(-c1ccccc1)c1ccc([nH]1)c(-c1ccccc1)c1nc(c(-c3ccccc3)c3ccc([nH]3)c2-c2ccccc2)C=C1	1.324918928	0.350858955	-1.782841045	0.93462	0.084	0.768	0.0546	0.219395263	-0.321433481	-1.06320981	2.1337	0.685706256
526	92-06-8	c1ccc(-c2cccc(-c3ccccc3)c2)cc1	0	1.266644514	-3.328555486	0.92845	0.023	1.471	0.1223	0.286386483	-0.156831021	-0.553766156	4.5952	1.246334765
527	92-24-0	c1ccc2cc3cc4ccccc4cc3cc2c1	0.161819428	0.286137061	-2.096999912	0.90099	0.034	1.346	0	0.137757587	-0.157188006	-0.673802354	2.3831	1.221877657
528	92-52-4	c1ccc(-c2ccccc2)cc1	0	1.316573405	-3.510726595	0.86232	0.086	1.305	0	0.345907319	-0.116094862	-0.377245579	4.8273	1.399609351
529	92-82-0	c1ccc2nc3ccccc3nc2c1	0	1.350068591	-1.773731409	0.82376	-0.412	2.184	0	0.33425527	-0.162431597	-0.512212988	3.1238	0.919779546
530	92-86-4	Brc1ccc(-c2ccc(Br)cc2)cc1	0	1.343854813	-3.122845187	0.82615	-0.604	3.011	0.0068	0.343913617	-0.139135186	-0.447901722	4.4667	1.213560033
531	92-88-6	Oc1ccc(-c2ccc(O)cc2)cc1	0.004011022	0.669539316	-3.898660684	0.84105	-0.3	0.754	0.0104	0.326490275	-0.32317778	-0.378322252	4.5682	1.32163431
532	92-92-2	O=C(O)c1ccc(-c2ccccc2)cc1	0	1.503899297	-2.711700703	0.72755	0.143	2.647	4.7132	0.373733149	-0.232333562	-0.229892037	4.2156	1.182190656
533	93-02-7	COc1ccc(OC)c(C=O)c1	10.86698124	0.787009237	-2.661290763	0.62436	-0.131	1.411	2.9799	0.557853492	-0.263070331	-0.546147928	3.4483	0.921468932
534	932-95-6	O=Cc1ccc(C=O)s1	0.129056463	1.727073749	-1.653326251	0.50853	-0.691	0.867	0.2308	1.281342636	-0.240744902	-0.331601752	3.3804	0.837997834
535	934-32-7	Nc1nc2ccccc2[nH]1	0	0.578365836	-4.300234164	0.84567	-0.177	1.865	1.4724	0.527243471	-0.396314652	-0.41630549	4.8786	1.273396158
536	934365-16-9	CC1(C)OB(c2ccc(B3OC(C)(C)C(C)(C)O3)c3nsnc23)OC1(C)C	0	1.777776747	-1.829423253	0.8213	0.04	1.615	1.9638	0.906981334	-0.359794611	-1.040544214	3.6072	1.459257936
537	935-14-8	C#Cc1ccc(C#C)cc1	0	1.510218023	-2.857481977	0.84885	-0.278	0.994	0.0001	0.29187248	-0.143967587	-0.306590828	4.3677	1.6031591
538	93655-34-6	COC(=O)c1cccc2cc3cccc(C(=O)OC)c3cc12	0.037811743	0.893591252	-2.021708748	0.86067	0.391	1.59	0.3488	0.2296611	-0.331548983	-0.876664375	2.9153	1.131669449
539	941-69-5	O=C1C=CC(=O)N1c1ccccc1	0	1.303978898	-1.825721102	0.38054	-0.401	1.452	5.4352	0.920838442	-0.263310281	-0.496319462	3.1297	0.294178208
540	94-41-7	O=C(/C=C/c1ccccc1)c1ccccc1	0.14585182	1.3106615	-2.0651385	0.47776	1.285	1.386	2.316	0.569079985	-0.238881091	-0.390217983	3.3758	0.81911858
541	95-01-2	O=Cc1ccc(O)cc1O	0.896402476	0.961101327	-2.927998673	0.47626	0.756	1.348	2.4401	0.902278221	-0.380502928	-0.516500171	3.8891	0.597884425
542	957230-70-5	Nc1nc(Br)cnc1Br	0.066595677	1.302042264	-2.777557736	0.72238	-0.482	1.351	1.1917	0.580311723	-0.203803657	-0.39075315	4.0796	0.357069672
543	957344-74-0	Brc1ncc(Br)n2ccnc12	0.006749083	1.589219606	-2.541880394	0.77424	-0.175	1.524	1.6606	0.446087194	-0.233097166	-0.527230838	4.1311	1.370052492
544	96606-37-0	N#Cc1c(F)cc(F)cc1F	0.052740073	2.178487526	-2.835712474	0.87443	0.239	1.507	0.8132	0.818436956	-0.199189029	-0.270067129	5.0142	1.491148437
545	97483-77-7	N#Cc1ccc(Br)cn1	0	2.246420671	-2.400879329	0.47365	0.412	1.126	1.9553	0.612095982	-0.241457294	-0.298853086	4.6473	0.90853551
546	98041-67-9	S=C=Nc1cc(Br)ccc1Br	0	1.642276001	-2.617523999	0.71891	-0.429	2.028	0.6613	0.395010965	-0.119618698	-0.476267052	4.2598	1.011311502
547	98057-08-0	Brc1ccc(-c2ccc(-c3ccc(Br)s3)s2)s1	0	0.558552959	-2.273347041	0.82614	-0.295	1.07	0.085	0.216022475	-0.148500227	-0.792890507	2.8319	1.072957342
548	98139-15-2	N#Cc1cc(N)ccn1	0	1.413352237	-2.961947763	0.65641	0.211	1.57	3.4245	0.586994356	-0.410940155	-0.354945219	4.3753	1.003890028
549	98327-87-8	c1ccc(P(c2ccccc2)c2ccc3ccccc3c2-c2c(P(c3ccccc3)c3ccccc3)ccc3ccccc23)cc1	0	0.85447787	-2.88712213	0.67759	-0.199	1.872	3.4472	0.323796792	-0.38859097	-0.765062304	3.7416	0.124431833
550	98349-22-5	N#Cc1cc(F)c(F)cc1F	0.05820281	2.067342105	-2.743457895	0.83718	0.122	1.577	0.8005	0.7028689	-0.199531646	-0.245856251	4.8108	1.488525921
551	98434-44-7	O=C(O)Cc1ccc(Br)cc1Br	0	1.42896896	-3.63073104	0.90195	-0.355	1.326	0.6416	0.870940521	-0.258775109	-0.358614363	5.0597	0.638455739
552	99163-12-9	O=Cc1ccc(-c2ccncc2)cc1	3.291133496	1.462437465	-2.229562535	0.47738	1.148	1.66	3.221	0.908545265	-0.263370227	-0.417262006	3.692	0.663044522
553	992-04-1	c1ccc(-c2c(-c3ccccc3)c(-c3ccccc3)c(-c3ccccc3)c(-c3ccccc3)c2-c2ccccc2)cc1	0	1.001081857	-3.409918143	0.92464	-0.002	1.252	0.0066	0.662919136	-0.375219065	-0.543712235	4.411	0.821409009
554	99-31-0	Nc1cc(C(=O)O)cc(C(=O)O)c1	0	0.973343292	-2.690656708	0.62329	0.354	1.486	2.5229	0.563564874	-0.41052706	0.194133879	3.664	1.024516656
555	99770-93-1	CC1(C)OB(c2ccc(B3OC(C)(C)C(C)(C)O3)cc2)OC1(C)C	0	1.684654939	-3.141345061	0.82302	0.593	1.496	0.0001	0.722962038	-0.238978072	-0.533646397	4.826	1.380761499
556	99-92-3	CC(=O)c1ccc(N)cc1	0.228525894	0.807858486	-3.206641514	0.47807	0.773	1.348	2.4667	0.497696242	-0.316942855	-0.231369023	4.0145	0.802333317
557	99970-84-0	O=Cc1ccnc(-c2cc(C=O)ccn2)c1	0	1.670810174	-1.898089826	0.53293	-0.791	3.89	0.0006	0.687865647	-0.269162696	-0.485943574	3.5689	0.598215314
558	857537-46-3	NNC(=O)c1cc(Br)c(O)c(Br)c1	0	1.557280829	-3.129819171	0.88328	-0.281	1.666	1.178	0.584982435	-0.32957864	-0.684969323	4.6871	0.013799394
559	33255-13-9	CCn1c2ccc(Br)cc2c2cc(Br)ccc21	1.252119423	0.658130161	-3.097869839	0.72498	-0.165	1.461	0.4744	0.422805871	-0.203154396	-0.665172258	3.756	0.676732514
560	61414-16-2	O=C(O)c1ccc(-c2nc(-c3ccc(C(=O)O)cc3)nc(-c3ccc(C(=O)O)cc3)n2)cc1	0.201219348	2.173450082	-1.749149918	0.56078	1.4	1.92	0.0329	0.483021308	-0.866284797	-1.434937054	3.9226	0.415598729
561	116-75-6	Cc1cc(C)c(Nc2ccc(Nc3c(C)cc(C)cc3C)c3c2C(=O)c2ccccc2C3=O)c(C)c1	0.331050603	0.335190733	-1.697609267	0.78377	-0.08	1.925	2.4755	0.172241028	-0.255896698	-0.607210787	2.0328	1.010340875
562	32724-62-2	CCc1cc(C)cc(CC)c1Nc1ccc(Nc2c(CC)cc(C)cc2CC)c2c1C(=O)c1ccccc1C2=O	0	0.356383673	-1.696616327	0.79258	0.04	1.877	2.2356	0.175889012	-0.249037273	-0.765661631	2.053	1.055207955
563	4851-50-7	CC(C)(C)c1ccc(Nc2ccc(Nc3ccc(C(C)(C)C)cc3)c3c2C(=O)c2c(O)ccc(O)c2C3=O)cc1	0	0.226972983	-1.550327017	0.75792	-0.716	2.409	3.1887	0.141461009	-0.427777419	-1.426520716	1.7773	0.772006078
564	12671-74-8	CCCCCCCCCCCCCCCCCCn1c(=O)c2ccc3sc4ccccc4c4ccc(c1=O)c2c34	12.28561476	0.856900317	-1.827299683	0.75018	0.006	2.24	2.2868	0.187385087	-0.308140217	-0.836911846	2.6842	0.846292383
565	2377-81-3	N#Cc1c(F)c(F)c(F)c(C#N)c1F	0.3860578	2.508379556	-2.064120444	0.86517	0.116	1.427	0.2018	0.833737572	-0.290370503	-0.273195005	4.5725	1.162842959
566	1416881-52-1	N#Cc1c(-n2c3ccccc3c3ccccc32)c(C#N)c(-n2c3ccccc3c3ccccc32)c(-n2c3ccccc3c3ccccc32)c1-n1c2ccccc2c2ccccc21	20.54587179	0.808341036	-1.637658964	0.35659	-1.864	2.217	3.0143	0.372399241	-0.739097276	-0.469186726	2.446	0.009795252
567	17014-39-0	Cn1c2ccc(Br)cc2c(=O)c2cc(Br)ccc21	9.207048115	0.951738134	-2.308661866	0.72454	-0.32	1.5	1.0784	0.289245513	-0.315332708	-0.732632671	3.2604	0.81166165
568	55011-44-4	Cc1cc2c(cc1N)S(=O)(=O)c1cc(N)c(C)cc1-2	0	0.365650564	-2.937849436	0.76614	-0.707	1.137	0.9653	0.372611118	-0.628502661	-0.742232881	3.3035	0.769527945
569	54983-19-6	Nc1ccc(-c2nnc(-c3ccc(N)cc3)nn2)cc1	0	0.25653831	-1.89986169	0.63684	-0.17	0.613	0.0046	0.615427863	-0.483114073	-0.708206853	2.1564	0.696596926
570	47797-98-8	O=[N+]([O-])c1ccc(C(=C(c2ccc([N+](=O)[O-])cc2)c2ccc([N+](=O)[O-])cc2)c2ccc([N+](=O)[O-])cc2)cc1	0	1.554660484	-1.299739516	0.73382	1.662	2.769	0.0012	0.279449774	-0.728541468	-0.56730155	2.8544	0.996454404
571	286380-59-4	N#CCc1ccc(-c2ccc(CC#N)cn2)nc1	0.010799061	1.734343304	-2.565156696	0.61229	0.3	2.028	0.0015	0.43200928	-0.488640879	-0.431206629	4.2995	0.906846342
572	443922-06-3	O=Cc1ccc(-c2nc(-c3ccc(C=O)cc3)nc(-c3ccc(C=O)cc3)n2)cc1	0.297687834	1.874470947	-1.621229053	0.47917	-1.589	4.626	0.8067	0.733574397	-0.430818826	-1.165796124	3.4957	0.477054362
