# Supplementary material for: Combining machine learning and high-throughput experimentation to discover photocatalytically active organic molecules
Source: Chem Sci. 2021 Jun 21;12(32):10742–54. doi: 10.1039/d1sc02150h (PMC8372320; doi:10.1039/d1sc02150h)
Supplement: SC-012-D1SC02150H-s006 [file SC-012-D1SC02150H-s006.csv]

ID	CAS	SMILES	HER (µmol/h)	EA* (V)	EA (V)	Sr (a.u.)	Δσ (Ang)	H_CT (Ang)	ΔD (a.u.)	E_eb (eV)	E_sol (eV)	E_b (eV)	S1-S0 (eV)	S1-T1 (eV)
573	4081-00-9	C1=CC=C2C(=C1)C3=CC=CC=C3C24C5=C(C=C(C=C5)O)OC6=C4C=CC(=C6)O	0	0.79837362	-3.363562061	0.18602	-0.119	1.181	6.616358	0.435591143	-0.390235349	-0.509255731	4.1619	0.941879693
574	5472-23-1	C1=CC=C(C=C1)N2C3=CC=CC=C3C(=O)C4=CC=CC=C42	3.328435279	0.816795317	-2.657141393	0.74428	0.058	1.471	1.457641	0.326462456	-0.282127792	-0.568737396	3.4739	0.848544689
575	159-66-0	C1=CC=C2C(=C1)C3=CC=CC=C3C24C5=CC=CC=C5C6=CC=CC=C46	0	0.91141766	-3.32864765	0.79918	0.183	2.177	1.24572	0.342764202	-0.18745655	-0.419835312	4.2401	1.086485848
576	31366-25-3	C1=CSC(=C2SC=CS2)S1	0	-0.587701429	-3.289368275	0.58855	0.208	1.407	0.006418	0.801497413	-0.199985368	-0.481888243	2.7017	0.219178042
577	85-01-8	C1=CC=C2C(=C1)C=CC3=CC=CC=C32	0.056961763	0.819947447	-3.204808507	0.95547	0.085	1.39	0.320257	0.524729158	-0.13152756	-0.512615345	4.0248	1.161957204
578	33626-98-1	COC(=O)C1=CC2=C(C=C1)C=C(C=C2)Br	0	1.408187017	-2.529075301	0.80962	0.275	2.171	2.412407	0.336306634	-0.187417829	-0.592042753	3.9373	1.321121676
579	84-60-6	C1=CC2=C(C=C1O)C(=O)C3=C(C2=O)C=C(C=C3)O	2.693391088	1.463294144	-1.626545161	0.66664	-0.782	2.261	0.001889	0.514701876	-0.450694939	-0.710477096	3.0898	0.612658909
580	319-89-1	C1(=C(C(=O)C(=C(C1=O)O)O)O)O	0	0.617670289	-1.129152965	0.56577	-0.035	1.415	0.258828	0.966322243	-0.333658022	-0.420016304	1.7468	0.703744464
581	7310-97-6	COC1=CC(=C(C=C1C=O)OC)C=O	1.369580323	1.09510384	-1.862820117	0.65017	0.394	1.729	0.000154	0.511161359	-0.270495016	-0.545551132	2.9579	0.976324301
582	63-91-2	C1=CC=C(C=C1)C[C@@H](C(=O)O)N	0.053924644	1.230004486	-4.166579388	0.93056	0.07	1.153	0.284091	0.927299661	-0.285228547	-0.098819319	5.3966	0.279544243
583	108-50-9	CC1=CN=CC(=N1)C	0.034462349	0.881794595	-3.14321641	0.6114	-0.111	1.426	0.031493	1.557689508	-0.139670079	-0.368616023	4.025	0.65414621
584	103-82-2	C1=CC=C(C=C1)CC(=O)O	0.060295031	1.401157767	-3.975631492	0.95468	0.286	1.416	0.480984	0.896508497	-0.211282547	-0.217589049	5.3768	0.99893915
585	5728-52-9	C1=CC=C(C=C1)C2=CC=C(C=C2)CC(=O)O	0.039319787	1.263221537	-3.398352089	0.84028	0.236	2.748	1.092799	0.385662898	-0.254521303	-0.392996941	4.6616	1.304412714
586	5274-99-7	C1CN(CCC1C(=O)O)C(=O)C2=CC=CC=C2	0	1.261548097	-3.525277402	0.56745	0.544	1.234	2.924108	0.880164438	-0.370490856	-0.382759257	4.7868	0.901618479
587	288-13-1	C1=CNN=C1	0	1.648471095	-5.063049381	0.85953	0.134	0.96	1.081253	0.808063309	-0.21147074	-0.375712826	6.7115	1.964173757
588	696-62-8	COC1=CC=C(C=C1)I	0	0.956085417	-3.063142751	0.49698	-0.418	2.012	4.403417	0.663707499	-0.138233567	-0.355771063	4.0192	0.42210925
589	4316-58-9	C1=CC(=CC=C1N(C2=CC=C(C=C2)Br)C3=CC=C(C=C3)Br)Br	0.922324405	0.311972721	-3.468072229	0.64606	0.218	2.23	0.004466	0.421452968	-0.182290131	-0.431689416	3.7801	0.642533896
590	17217-57-1	COC1=CC(=NC=C1)C2=NC=CC(=C2)OC	0.168819853	1.526368958	-2.988883522	0.50511	0.324	1.548	0.272899	0.457249352	-0.251663463	-0.343123684	4.5153	0.937734296
591	135-67-1	C1=CC=C2C(=C1)NC3=CC=CC=C3O2	0	-0.260878723	-4.013075003	0.69579	0.487	0.977	0.48634	0.666010364	-0.197364049	-0.518850084	3.7522	0.729608233
592	72914-19-3	CC(C)(C)C1=CC(=NC=C1)C2=NC=CC(=C2)C(C)(C)C	0.236385474	1.383358638	-3.02378449	0.52678	0.266	1.56	0.000867	0.511624604	-0.162201144	-0.324435004	4.4072	1.051781426
593	5535-48-8	C=CS(=O)(=O)C1=CC=CC=C1	0	2.195159119	-2.955165129	0.82144	0.8	1.594	2.251794	0.672596505	-0.31728969	-0.393628404	5.1503	0.698283591
594	32159-21-0	C1CC(=O)N([C@@H]1C(=O)O)C(=O)OCC2=CC=CC=C2	0	1.328575379	-3.774106699	0.48466	0.187	1.226	1.310755	0.965884985	-0.445302258	-0.50046822	5.1027	0.694612488
595	1122-58-3	CN(C)C1=CC=NC=C1	0	0.449191117	-4.321008196	0.63896	-0.278	1.394	2.835702	0.706720156	-0.213922805	-0.373207171	4.7702	0.279397601
596	480424-86-0	B(C1=CC2=C(C=C1)C3=C(C2(CCCCCCCCCCCC)CCCCCCCCCCCC)C=C(C=C3)B(O)O)(O)O	0.13164884	1.15433552	-2.904960498	0.80696	0.415	2.547	0.128172	0.360030261	-0.472548715	-0.905283127	4.0593	1.17809092
597	477-75-8	C1=CC=C2C3C4=CC=CC=C4C(C2=C1)C5=CC=CC=C35	0.040778379	0.98563063	-3.982095455	0.843	-0.1	2.053	1.46617	0.453667066	-0.191461401	-0.426591461	4.9677	1.28993652
598	99-12-7	CC1=CC(=CC(=C1)[N+](=O)[O-])C	0	1.69407854	-2.070891132	0.46959	0.08	1.318	4.329881	0.820692101	-0.187982354	-0.402281372	3.765	0.854701518
599	84-67-3	CC1=C(C=CC(=C1)N)C2=C(C=C(C=C2)N)C	0.054985524	0.371780057	-4.361235586	0.77621	-0.677	1.336	0.036695	0.536719219	-0.327977636	-0.317000425	4.733	1.161059966
600	14235-81-5	C#CC1=CC=C(C=C1)N	0	0.70118136	-3.903166412	0.76847	-0.659	1.101	0.104728	0.332680265	-0.245878368	-0.270899052	4.6044	1.53535782
601	21512-16-3	C1=C(SC(=C1)C#N)C=O	0.038390789	1.765448555	-1.755694045	0.46335	1.029	1.557	3.496565	0.97474912	-0.263951379	-0.265436939	3.5212	0.79130093
602	43192-33-2	COC1=C(C=CC(=C1)Br)C=O	12.28574297	1.191749697	-2.509894055	0.4856	0.77	1.335	2.593253	0.876996253	-0.203154124	-0.47973219	3.7017	0.530470416
603	99-81-0	C1=CC(=CC=C1C(=O)CBr)[N+](=O)[O-]	0	1.943325803	-1.390772743	0.50385	1.079	1.707	4.131292	1.100850012	-0.270579099	-0.43422845	3.3341	0.443860385
604	28320-32-3	CC1(C2=C(C=CC(=C2)Br)C3=C1C=C(C=C3)Br)C	0.079921379	1.105128782	-3.05833046	0.79538	-0.422	1.02	0.307294	0.337823391	-0.141776043	-0.481389073	4.1635	1.189745248
605	81090-53-1	C1=CC=C(C=C1)N(C2=CC=C(C=C2)Br)C3=CC=C(C=C3)Br	0.728539138	0.233333969	-3.561587399	0.65599	0.202	1.795	1.527392	0.438066555	-0.164892587	-0.423651095	3.7949	0.629628937
606	132717-37-4	C1=CC=C(C=C1)C2(C3=C(C=CC(=C3)Br)C4=C2C=C(C=C4)Br)O	0.101334189	1.141142666	-2.893168753	0.8225	-0.527	1.226	0.531197	0.369273396	-0.228446211	-0.492198034	4.0343	1.090019099
607	959-88-6	C1=CC(=CC=C1C#CC#CC2=CC=C(C=C2)Br)Br	0	1.001469784	-2.282204591	0.83668	-0.064	3.935	0.000315	0.387911231	-0.159733052	-0.604714429	3.2837	0.857327109
608	105309-59-9	C1=CC(=CC=C1C(C2=CC=C(C=C2)Br)(C3=CC=C(C=C3)Br)C4=CC=C(C=C4)Br)Br	0.067912528	1.532981032	-3.308913335	0.72631	-0.087	1.854	2.883909	0.364538902	-0.216552968	-0.530234803	4.8419	1.331516937
609	83-33-0	C1CC(=O)C2=CC=CC=C21	0.100824034	0.89558882	-2.902568843	0.47731	0.63	1.34	2.409771	1.541266019	-0.191866332	-0.329256216	3.7982	0.419355548
610	95-15-8	C12=CC=CC=C1SC=C2	0	1.046766693	-3.609518934	0.85651	0.025	1.427	0.328302	0.459715784	-0.111191005	-0.368647892	4.6563	1.585179342
611	90-44-8	C1C2=CC=CC=C2C(=O)C3=CC=CC=C31	0	1.150359432	-2.48856592	0.48955	0.931	1.254	2.109494	1.0315003	-0.211024448	-0.538652356	3.6389	0.43620084
612	82-44-0	C1=CC=C2C(=C1)C(=O)C3=C(C2=O)C(=CC=C3)Cl	0	1.48933846	-1.389811912	0.55162	0.138	1.841	1.851514	1.149077144	-0.238551943	-0.697428102	2.8792	0.383060001
613	589-87-7	C1=CC(=CC=C1Br)I	0	1.437427736	-2.933573724	0.54385	-0.581	2.139	3.196394	0.69877666	-0.097035768	-0.348314529	4.371	0.752244143
614	580-13-2	C1=CC=C2C=C(C=CC2=C1)Br	0.017903159	1.236677458	-3.034668602	0.87261	-0.179	1.793	0.485193	0.317400494	-0.110695841	-0.460130208	4.2714	1.558697822
615	134-32-7	C1=CC=C2C(=C1)C=CC=C2N	0	0.393151784	-3.44949434	0.76944	0.03	1.611	2.726281	0.39778526	-0.208581798	-0.393706108	3.8427	1.182017783
616	4105-92-4	CCOC(=O)C1=CC(=CC(=C1)C(=O)OCC)C(=O)OCC	0.043412253	2.118120854	-2.540468944	0.9196	0.263	1.525	0.018112	0.978914	-0.290392463	-0.405353248	4.6586	1.166162575
617	66-71-7	C1=CC2=C(C3=C(C=CC=N3)C=C2)N=C1	0.477717782	1.264551381	-2.821337316	0.9075	0.203	1.375	0.955141	0.598008236	-0.30084084	-0.546930748	4.0859	1.182455123
618	121124-97-8	B(C1=CC(=C(C=C1)OC)C=O)(O)O	2.75972868	1.097020169	-2.631968818	0.48887	0.625	1.339	2.361956	0.927385594	-0.426146428	-0.466711933	3.729	0.482474417
619	27318-90-7	C1=CC2=C(C3=C(C=CC=N3)C(=O)C2=O)N=C1	0	1.337804908	-1.022859858	0.55644	0.343	1.42	1.299494	1.420241068	-0.389513106	-0.785532583	2.3607	0.44667534
620	1415238-25-3	C1=CC(=CC=C1C=O)C2=CC(=C3C=CC4=C(C=C(C5=C4C3=C2C=C5)C6=CC=C(C=C6)C=O)C7=CC=C(C=C7)C=O)C8=CC=C(C=C8)C=O	3.19482265	0.735755249	-1.866668992	0.79565	1.731	2.501	0.135714	0.155581152	-0.620469614	-1.344075859	2.6024	0.699592727
621	99768-12-4	B(C1=CC=C(C=C1)C(=O)OC)(O)O	0.039402307	1.886501098	-2.785046884	0.76763	0.675	1.506	0.96121	0.724379827	-0.378656151	-0.371423415	4.6716	1.323050876
622	56278-50-3	C1=CC=C2C(=C1)N=C(S2)CC#N	0	1.540825097	-3.088584065	0.80805	0.185	1.763	1.935169	0.58689525	-0.267559325	-0.440556075	4.6294	0.491583237
623	693-98-1	CC1=NC=CN1	0	1.036004651	-5.329280413	0.79711	0.117	1.286	1.638244	0.625217142	-0.269776094	-0.370632232	6.3653	2.172074702
624	30169-25-6	CC1=CC(=NN1C2=NN=C(N=N2)N3C(=CC(=N3)C)C)C	0	0.802492078	-1.418992658	0.63134	-0.293	0.522	0.057884	1.221715178	-0.377140944	-0.696556422	2.2215	0.717301106
625	87-82-1	C1(=C(C(=C(C(=C1Br)Br)Br)Br)Br)Br	0	1.693266473	-2.122756441	0.5962	0.394	2.089	0.016041	0.752076794	-0.094474912	-0.556256019	3.816	0.805266722
626	1198-64-7	C1(=C(C(=C(C(=C1F)F)N)F)F)N	0	0.078473019	-4.551242107	0.78173	-0.499	0.696	0.177363	0.857351436	-0.221654161	-0.333880075	4.6297	0.905259134
627	501433-06-3	C1=CC(=C(C(=C1I)F)F)I	0	1.512518651	-2.717867953	0.61919	0.383	0.905	0.020902	0.781193701	-0.107035349	-0.428807993	4.2304	0.395190962
628	6271-79-0	C1=CC(=C(C=C1C2=CC(=C(C=C2)N)[N+](=O)[O-])[N+](=O)[O-])N	0	0.650350162	-1.995659861	0.68087	0.668	0.77	0.793763	0.339362735	-0.464061483	-0.518985401	2.646	0.265252841
629	1038-66-0	C1(=C(C(=C(C(=C1F)F)N)F)F)C2=C(C(=C(C(=C2F)F)N)F)F	0	0.858687739	-3.551479217	0.79999	-0.596	0.907	0.034193	0.42867131	-0.273994117	-0.583763906	4.4102	1.149512797
630	106-40-1	C1=CC(=CC=C1N)Br	0	0.503666262	-4.111274162	0.73005	-0.486	1.572	0.839351	0.657410586	-0.211393977	-0.292616977	4.615	0.908843542
631	31181-90-5	C1=CC(=NC=C1Br)C=O	0	1.401980936	-2.177026386	0.52291	0.536	1.531	2.188591	1.569810645	-0.166184851	-0.291145623	3.579	0.510940049
632	448-97-5	C1=CC(=C(C=C1C2=CC(=C(C=C2)N)F)F)N	0	0.3121392	-3.831291464	0.79347	-0.579	0.753	0.138386	0.345875678	-0.30191517	-0.491487431	4.1434	1.21596671
633	16400-50-3	C1=C(C=C(C=C1Br)Br)C2=CC(=CC(=C2)Br)Br	0.051383197	1.816305087	-2.762719958	0.83479	-0.632	2.162	0.011803	0.404520465	-0.126725745	-0.594323093	4.579	1.346058656
634	205383-17-1	C1=CC(=CC=C1C#CC2=CC(=CC(=C2)C#CC3=CC=C(C=C3)C(=O)O)C#CC4=CC=C(C=C4)C(=O)O)C(=O)O	0	1.310393414	-2.091837874	0.86364	0.927	3.455	0.003963	0.30216652	-0.568062827	-0.766142499	3.4022	0.874321654
635	89901-03-1	COC(=O)C1=CC=C(C=C1)C2=CC=C(C=C2)Br	0.03574609	1.466442056	-2.667183261	0.73308	-0.077	2.981	5.256882	0.380129888	-0.20958116	-0.653617846	4.1336	1.101285393
636	73016-08-7	C1=CC=C2C(=C1)C(=C3C=CC=CC3=C2C(=O)O)C(=O)O	0	0.973571018	-1.944995223	0.84677	-0.182	2.32	0.054826	0.236685711	-0.368446091	-0.391411053	2.9186	1.178308856
637	150-13-0	C1=CC(=CC=C1C(=O)O)N	0.059001238	1.040194484	-3.427872458	0.70013	0.089	1.993	3.60544	0.355428477	-0.327044479	-0.065053846	4.4681	1.464466533
638	921619-89-8	C1=CC(=CC=C1C2=CC(=CC(=C2)C(=O)O)C(=O)O)C3=CC(=CC(=C3)C(=O)O)C(=O)O	0.052186056	1.414747661	-2.494715592	0.59852	1.743	2.826	0.068388	0.375644922	-0.596839865	-0.011295903	3.9095	0.984093127
639	4371-28-2	C1=C(C=C(C=C1C(=O)O)C(=O)O)C2=CC(=CC(=C2)C(=O)O)C(=O)O	0	1.861022505	-2.383954989	0.80725	0.593	2.689	0.160959	0.501464803	-0.567292475	0.194397913	4.245	1.036735292
640	55119-09-0	C1=C(C=C(C2=C1C3=C(N2)C(=CC(=C3)Br)Br)Br)Br	0.128177078	1.011759465	-2.749868061	0.74908	-0.241	1.512	0.250676	0.390498482	-0.147281161	-0.707984383	3.7616	0.686268986
641	4612-26-4	B(C1=CC=C(C=C1)B(O)O)(O)O	0.052996895	1.717088932	-3.248578917	0.85706	0.518	1.444	0.105372	0.820341864	-0.422067563	-0.492671136	4.9657	1.390938688
642	624-38-4	C1=CC(=CC=C1I)I	0	1.389461071	-2.935490978	0.60215	0.446	1.295	0.000437	0.722612752	-0.106325869	-0.364208872	4.325	0.393894833
643	736989-93-8	B1(OC(C(O1)(C)C)(C)C)C2=CC3=C(C=C2)C=C(C=C3)C(=O)OC	1.485444902	1.24982623	-2.485631372	0.78346	0.617	2.243	1.419356	0.395136104	-0.253825646	-0.922341047	3.7355	1.200206904
644	5720-07-0	B(C1=CC=C(C=C1)OC)(O)O	0	1.064453086	-3.977382893	0.88823	-0.077	1.495	0.935773	0.659388167	-0.33216023	-0.379213569	5.0419	1.464631841
645	540-38-5	C1=CC(=CC=C1O)I	0	0.980097212	-3.058366216	0.51119	-0.348	1.997	4.093814	0.707132162	-0.199367644	-0.307757205	4.0385	0.437350572
646	327-92-4	C1=C(C(=CC(=C1[N+](=O)[O-])F)F)[N+](=O)[O-]	0	2.358212385	-1.516384268	0.51681	-0.404	2.008	0.381897	1.360677219	-0.313774806	-0.41288656	3.8746	0.500177055
647	611-99-4	C1=CC(=CC=C1C(=O)C2=CC=C(C=C2)O)O	0	1.007117625	-2.782454137	0.53231	0.77	1.229	1.73846	0.836856483	-0.42372084	-0.409527244	3.7896	0.603327991
648	643-79-8	C1=CC=C(C(=C1)C=O)C=O	0.491227975	1.34878015	-2.001882786	0.5375	-0.198	1.126	1.400108	1.394754964	-0.231158279	-0.575518795	3.3507	0.411769228
649	619-12-5	C1=CC(=C(C=C1C(=O)O)O)C=O	8.190408592	1.609885907	-1.943910227	0.67383	0.65	1.487	0.756718	0.574766058	-0.268568347	-0.175558653	3.5538	1.016952078
650	55243-02-2	C1=CC(=NC2=C1C=CC(=N2)Cl)Cl	0.12164538	2.120288778	-2.161367643	0.77726	-0.326	1.181	0.693338	0.55922759	-0.305562218	-0.559560899	4.2817	0.799223909
651	20469-65-2	COC1=CC(=CC(=C1)Br)OC	0.034788919	0.885445699	-4.108654803	0.88545	-0.176	1.336	0.40337	0.761124279	-0.162190233	-0.389318916	4.9941	1.052875946
652	120173-41-3	C1=C(C=C(C=C1C=O)Br)C=O	0.831448239	1.64546792	-2.013438309	0.47995	-0.471	1.555	1.464394	1.066053018	-0.237914927	-0.367582989	3.6589	0.501110784
653	158014-74-5	C1=CC=NC(=C1)C2=CC(=CC(=N2)C3=CC=CC=N3)C4=CC=C(C=C4)C(=O)O	0.440961312	1.444878462	-2.334209195	0.65915	0.451	2.423	4.834043	0.373697953	-0.339817163	-0.630292913	3.7791	0.700565259
654	91983-26-5	B(C1=CC=C(C=C1)CC#N)(O)O	0	1.635633865	-3.575555911	0.94571	0.304	1.393	0.366442	0.890340158	-0.448404428	-0.27774762	5.2112	1.457546808
655	1148-79-4	C1=CC=NC(=C1)C2=NC(=CC=C2)C3=CC=CC=N3	0.170317288	1.375200282	-2.764032087	0.76176	-0.206	1.483	0.363199	0.395765773	-0.194946025	-0.458997111	4.1392	1.059996599
656	620-93-9	CC1=CC=C(C=C1)NC2=CC=C(C=C2)C	0.07398759	0.007440478	-4.157360798	0.70315	0.389	1.052	0.750558	0.467761431	-0.167992933	-0.455592023	4.1648	0.786074592
657	101-70-2	COC1=CC=C(C=C1)NC2=CC=C(C=C2)OC	0.054951294	-0.238688969	-4.141762737	0.70796	0.088	1.125	0.417648	0.469488913	-0.258965969	-0.520660387	3.9031	0.644924763
658	1416881-53-2	C1=CC=C2C(=C1)C3=CC=CC=C3N2C4=C(C(=C(C(=C4N5C6=CC=CC=C6C7=CC=CC=C75)C#N)N8C9=CC=CC=C9C1=CC=CC=C18)N1C2=CC=CC=C2C2=CC=CC=C21)C#N	1.602957133	0.760287869	-1.41992693	0.34186	-2.071	2.287	0.002829	0.421300857	-0.727472336	-0.406541159	2.1802	0.036691173
659	4czbn	N#CC1=C(N2C(C=CC=C3)=C3C4=C2C=CC=C4)C(N5C(C=CC=C6)=C6C7=C5C=CC=C7)=CC(N8C(C=CC=C9)=C9C%10=C8C=CC=C%10)=C1N%11C(C=CC=C%12)=C%12C%13=C%11C=CC=C%13	1.653428547	0.717984909	-2.200058575	0.36153	-2.307	2.184	0.939343	0.436042307	-0.610726063	-0.574656868	2.9181	-0.01049812
660	96220-15-4	CCC1=CC=C(C=C1)C(=O)CC#N	0.066125352	1.433409252	-2.497845627	0.50388	0.538	1.279	2.21046	1.107364289	-0.289492694	-0.354785741	3.9313	0.554301392
661	199102-69-7	CCCC1=CC=C(C=C1)C(=O)CC#N	0.055480176	1.433531268	-2.496158172	0.50089	0.553	1.264	2.232318	1.096998471	-0.288453549	-0.400098452	3.9297	0.555569248
662	39528-62-6	CC(C)(C)C1=CC=C(C=C1)C(=O)CC#N	0.0435262	1.429728761	-2.497584507	0.49917	0.57	1.287	2.250466	1.087596177	-0.290293768	-0.41184841	3.9273	0.56213928
663	2623-25-8	C1CCC2=C(C1)C=CC(=C2)C(=O)CC#N	0	1.396419027	-2.541959498	0.50776	0.516	1.258	2.167793	0.929905007	-0.288812793	-0.481102288	3.9384	0.619104804
664	4894-75-1	C1CC(=O)CCC1C2=CC=CC=C2	0	0.179905724	-4.1209268	0.52524	0.035	0.988	0.866654	1.935126729	-0.213902641	-0.286552335	4.3008	0.630542747
665	103-26-4	COC(=O)/C=C/C1=CC=CC=C1	0	1.628500967	-2.524213784	0.79428	0.083	2.298	2.300601	0.325580184	-0.204684161	-0.217535153	4.1527	1.649130006
666	100-10-7	CN(C)C1=CC=C(C=C1)C=O	0.340306536	0.726152136	-3.107276541	0.65234	0.014	2.15	4.547532	0.219709179	-0.257254651	-0.345683937	3.8334	1.038374691
667	552-16-9	C1=CC=C(C(=C1)C(=O)O)[N+](=O)[O-]	0	1.897203493	-1.91198827	0.58259	-0.22	1.292	0.085673	1.232704843	-0.340716687	-0.185293747	3.8092	0.401381995
668	142-08-5	C1=CC(=O)NC=C1	0	0.993630072	-3.41337191	0.75278	-0.173	1.327	1.197264	0.564982752	-0.302899838	-0.607061311	4.407	1.417347092
